# Supplementary material for: Tuning the Envelope Structure of Enzyme Nanoreactors for In Vivo Detoxification of Organophosphates
Source: MDPI journal article supplement (doi:10.3390/ijms242115756), 2023-10-30
Supplement: s1 [file s1]

# Supplementary Material

for

## **Tuning the envelope structure of enzyme nanoreactors for *in vivo* detoxification of organophosphates**

**Tatiana Pashirova <sup>1\*</sup>, Zukhra Shaihutdinova <sup>1,2</sup>, Dmitry Tatarinov <sup>1</sup>, Milana Mansurova <sup>2</sup>, Renata Kazakova <sup>2</sup>, Andrei Bogdanov <sup>1</sup>, Eric Chabrière <sup>3,4</sup>, Pauline Jacquet <sup>3</sup>, David Daudé <sup>3</sup>, Almaz Akhunzianov <sup>2</sup>, Regina Miftakhova <sup>2</sup>, Patrick Masson <sup>2\*</sup>**

<sup>1</sup> Arbuzov Institute of Organic and Physical Chemistry, FRC Kazan Scientific Center, Russian Academy of Sciences, Arbuzov Str., 8, Kazan, 420088, Russia

<sup>2</sup> Institute of Fundamental Medicine and Biology, Kazan Federal University, 420008 Kazan, Russia

<sup>3</sup> Gene&GreenTK, 19–21 Boulevard Jean Moulin, 13005 Marseille, France

<sup>4</sup> IRD, APHM, MEPHI, IHU-Méditerranée Infection, Aix Marseille Université, 19–21 Boulevard Jean Moulin, Moulin, 13005 Marseille, France

\* Correspondence: [tatiana\\_pashirova@mail.ru](mailto:tatiana_pashirova@mail.ru) or [pashirova@iopc.ru](mailto:pashirova@iopc.ru) (T.P.);  
[pym.masson@free.fr](mailto:pym.masson@free.fr) or [pmasson@kpfu.ru](mailto:pmasson@kpfu.ru) (P.M.)

## Contents

|                                                                                                                                       |     |
|---------------------------------------------------------------------------------------------------------------------------------------|-----|
| <b>Figure S1.</b> <sup>1</sup> H NMR spectra of mPEGSAC-2000                                                                          | S3  |
| <b>Figure S2.</b> <sup>1</sup> H NMR spectra of copolymer <b>1a</b>                                                                   | S4  |
| <b>Figure S3.</b> <sup>13</sup> C NMR spectra of copolymer <b>1a</b>                                                                  | S5  |
| <b>Figure S4.</b> IR spectra of copolymer <b>1a</b>                                                                                   | S6  |
| <b>Figure S5.</b> <sup>1</sup> H NMR spectra of copolymer <b>1b</b>                                                                   | S7  |
| <b>Figure S6.</b> <sup>13</sup> C NMR spectra of copolymer <b>1b</b>                                                                  | S8  |
| <b>Figure S7a.</b> IR spectra of copolymer <b>1b</b>                                                                                  | S9  |
| <b>Figure S7b.</b> Comparison of IR spectra of copolymer <b>1a</b> and <b>1b</b>                                                      | S10 |
| <b>Figure S8.</b> Screen shot of empty nanoreactors distribution based on <b>1a</b> copolymer                                         | S11 |
| <b>Figure S9.</b> Screen shot of empty nanoreactors distribution based on <b>1b</b> copolymer                                         | S12 |
| <b>Figure S10.</b> TEM Images of empty nanoreactors based on <b>1a</b>                                                                | S13 |
| <b>Figure S11.</b> TEM Images of empty nanoreactors based on <b>1b</b>                                                                | S14 |
| <b>Figure S12.</b> UV Absorbance spectra of pNp for EE of nanoreactors                                                                | S15 |
| <b>Figure S13.</b> UV Absorbance spectra of pNp after the neutralization of POX                                                       | S16 |
| <b>Figure S14.</b> UV Absorbance spectra of enzyme for EE of nanoreactors                                                             | S17 |
| <b>Figure S15.</b> TEM Images of enzyme-loaded nanoreactors based on <b>1b</b>                                                        | S18 |
| <b>Figure S16.</b> Particle size distribution for nanoreactors based <b>1b</b>                                                        | S19 |
| <b>Table 1S.</b> <i>In vitro</i> stability of nanoreactors based <b>1b</b> in blood.                                                  | S20 |
| <b>Figure S17.</b> UV Absorbance spectra of pNp after the neutralization of POX                                                       | S21 |
| <b>Table 2S.</b> Prophylaxis and post-exposure treatment of paraoxon                                                                  | S22 |
| <b>Figure S18.</b> Elevated cross maze parameters on the 1 <sup>st</sup> day of experiment                                            | S23 |
| <b>Figure S19.</b> Elevated cross maze parameters on the 30 <sup>th</sup> day of experiment.                                          | S24 |
| <b>Figure S20.</b> Elevated cross maze parameters on the 1 <sup>st</sup> vs 30 <sup>th</sup> days of experiment                       | S25 |
| <b>Figure S21.</b> St's t-test for free enzyme (1) and nanoreactor based on <b>1b</b> (2) 1 <sup>st</sup> injection                   | S26 |
| <b>Figure S22.</b> St's t-test for nanoreactor based on <b>1b</b> 1st injection and 2nd injection (after 30 days)                     | S27 |
| <b>Figure S23.</b> One Way ANOVA for free enzyme and nanoreactor based on <b>1b</b> .                                                 | S28 |
| <b>Figure S24.</b> Pharmacokinetic profiles in mouse plasma after intravenous injection of free enzyme and enzyme-loaded nanoreactors | S29 |
| <b>Table 3S.</b> Pharmacokinetic parameters observed in mouse                                                                         | S30 |
| <b>Figure S25.</b> St's t-test for free enzyme and nanoreactor 2 <sup>nd</sup> injection                                              | S31 |
| <b>Figure S26.</b> The ratio of the signals from positive and negative control samples with tested dilution factors                   | S32 |
| <b>Figure S27.</b> The receiver operating characteristic analysis of ELISA                                                            | S33 |
| <b>Figure S28.</b> The western blot membranes for anti-PTE-IgG from 3 independent experiments                                         | S34 |
| <b>Figure S29.</b> UV Absorbance and calibration curve of PTE in Tris buffer                                                          | S35 |
| <b>Figure S30.</b> Transmittance of polymersomes under centrifugation conditions vs time                                              | S36 |

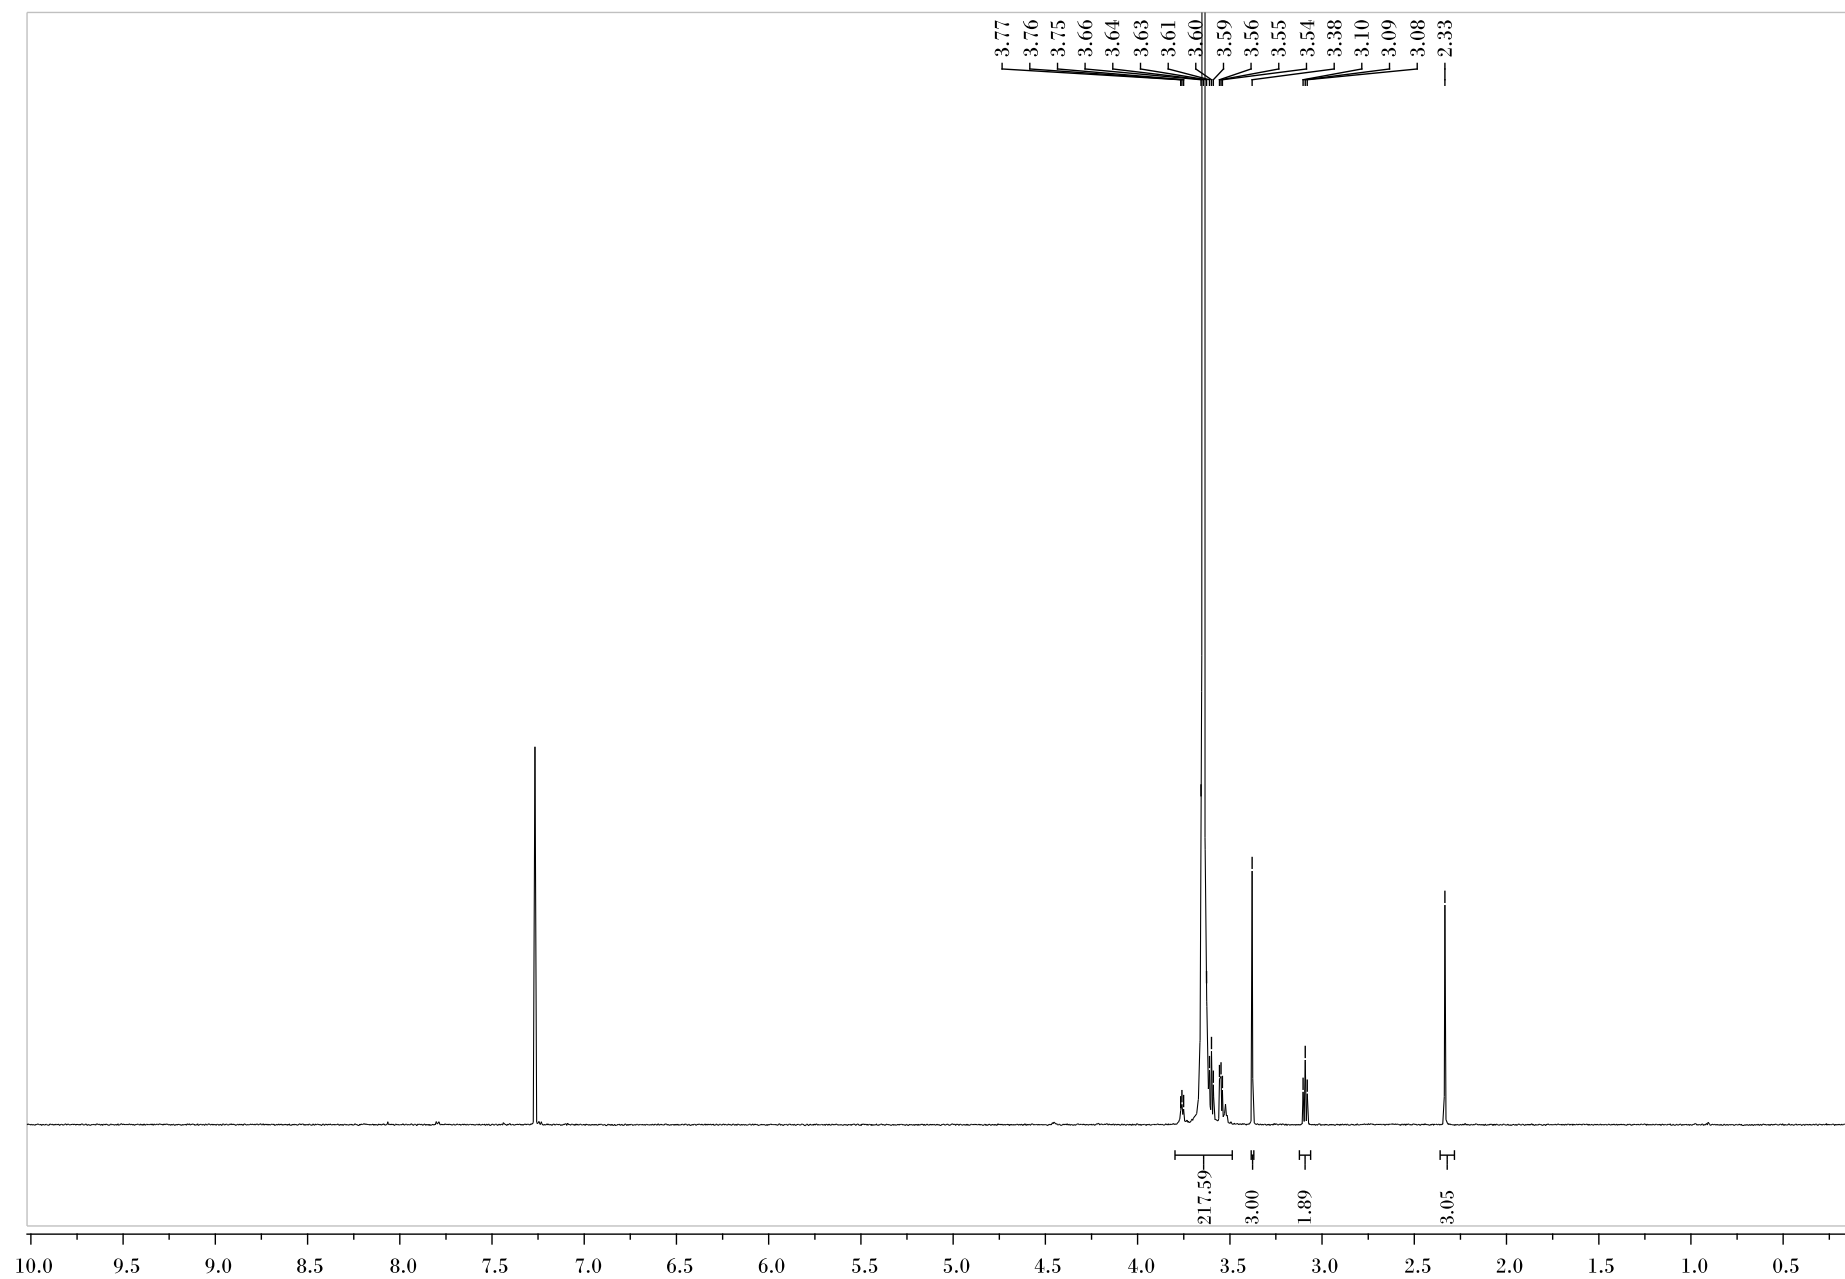

**Figure S1.**  $^1\text{H}$  NMR spectra of mPEGSAc-2000

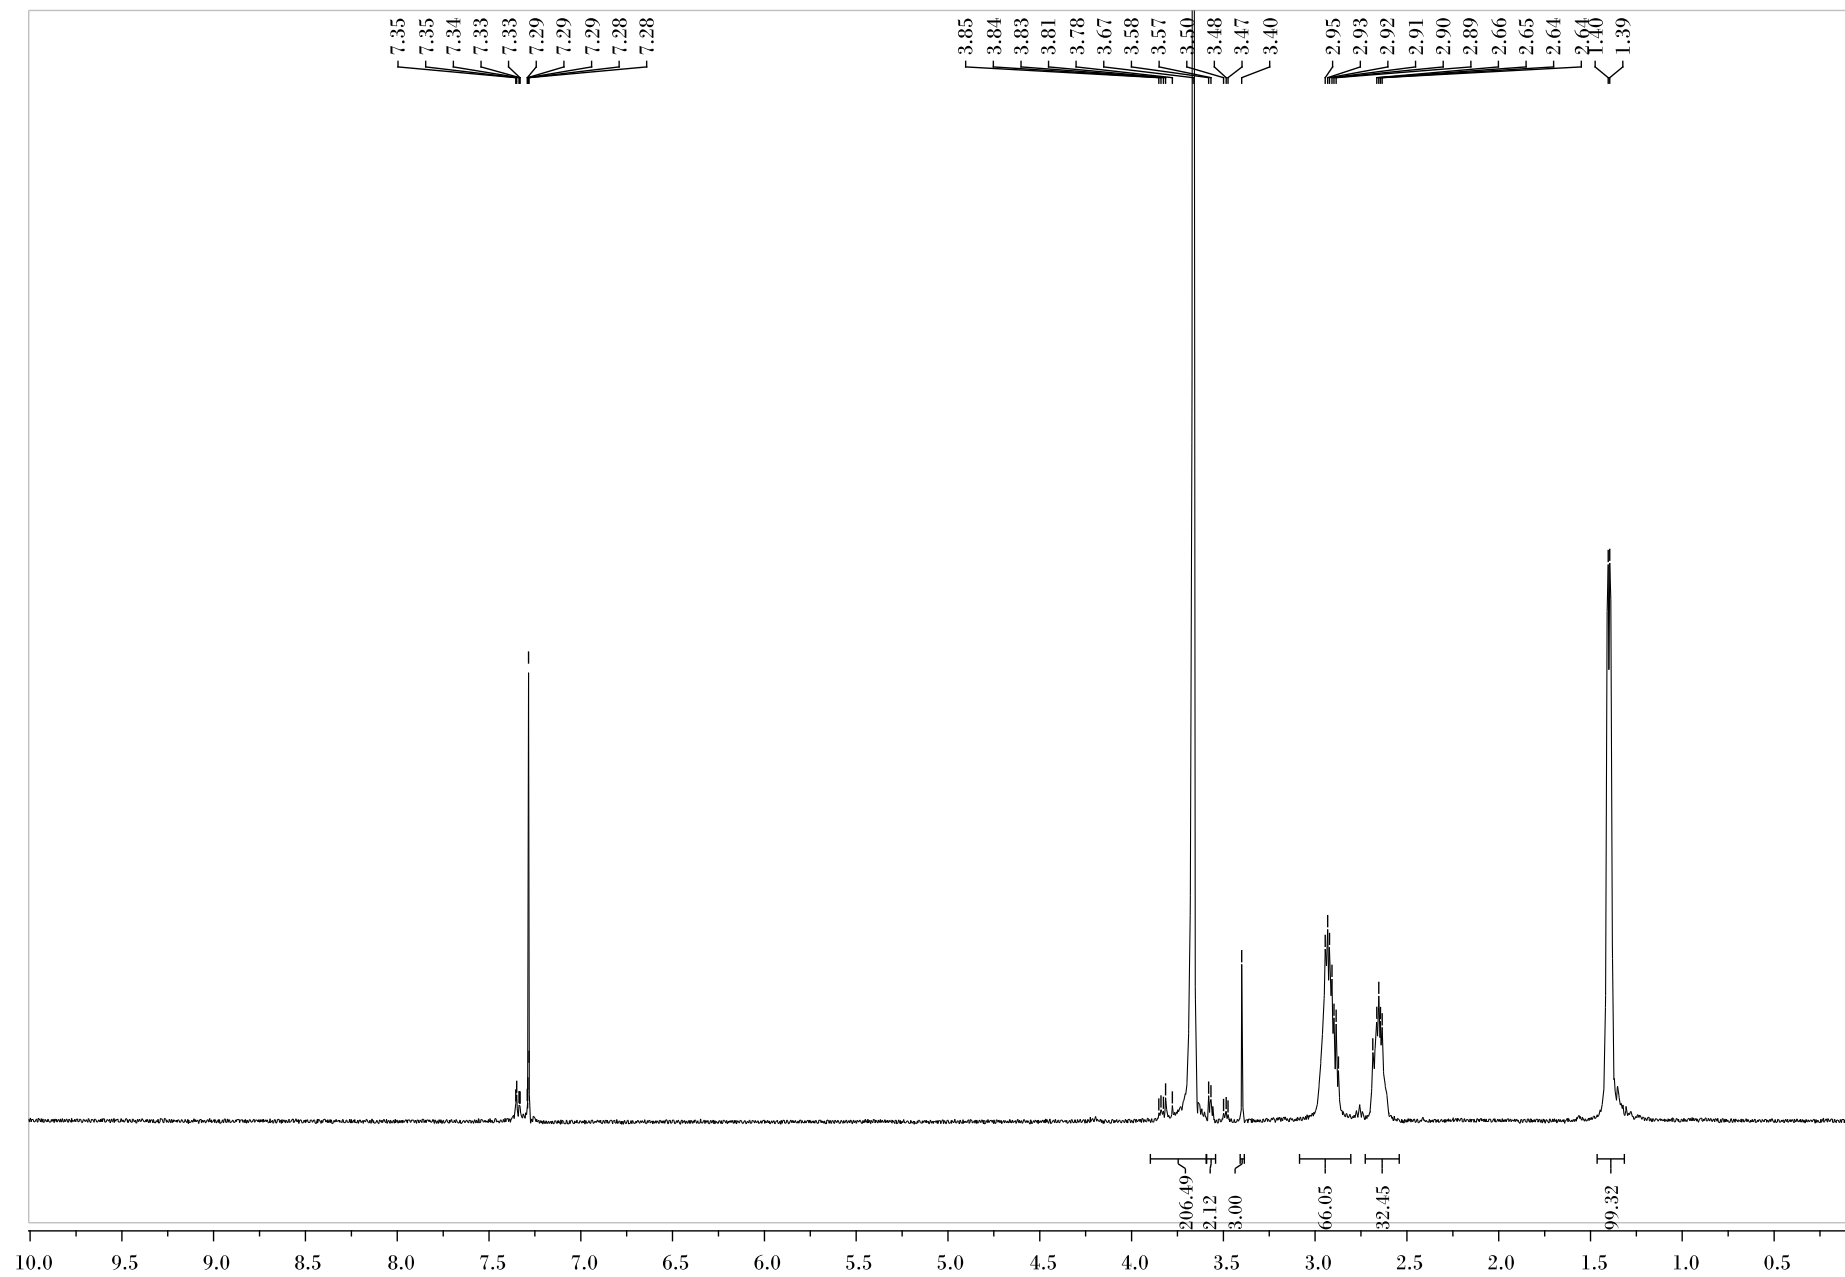

**Figure S2.**  $^1\text{H}$  NMR spectra of copolymer **1a**

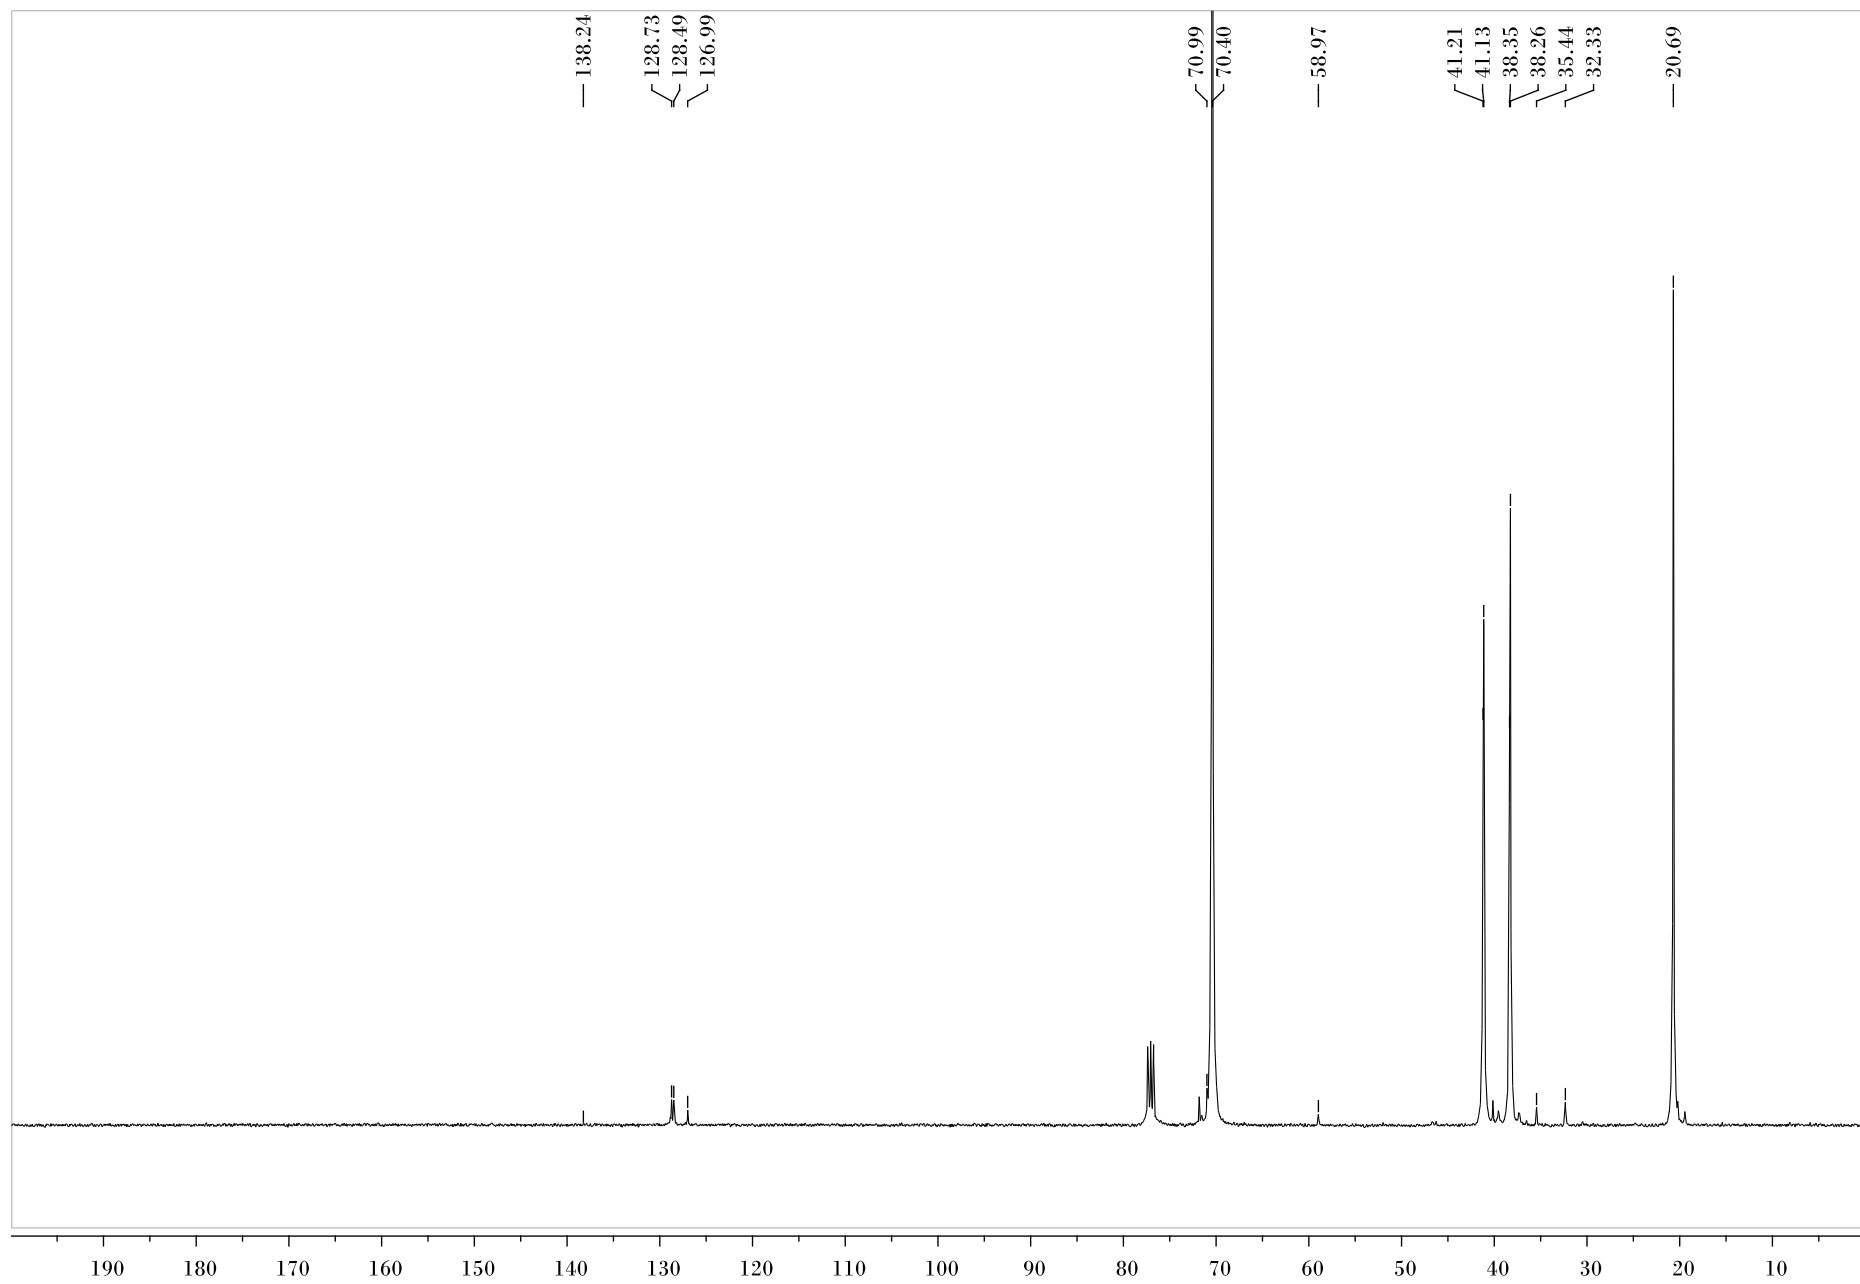

**Figure S3**  $^{13}\text{C}$  NMR spectra of copolymer **1a**

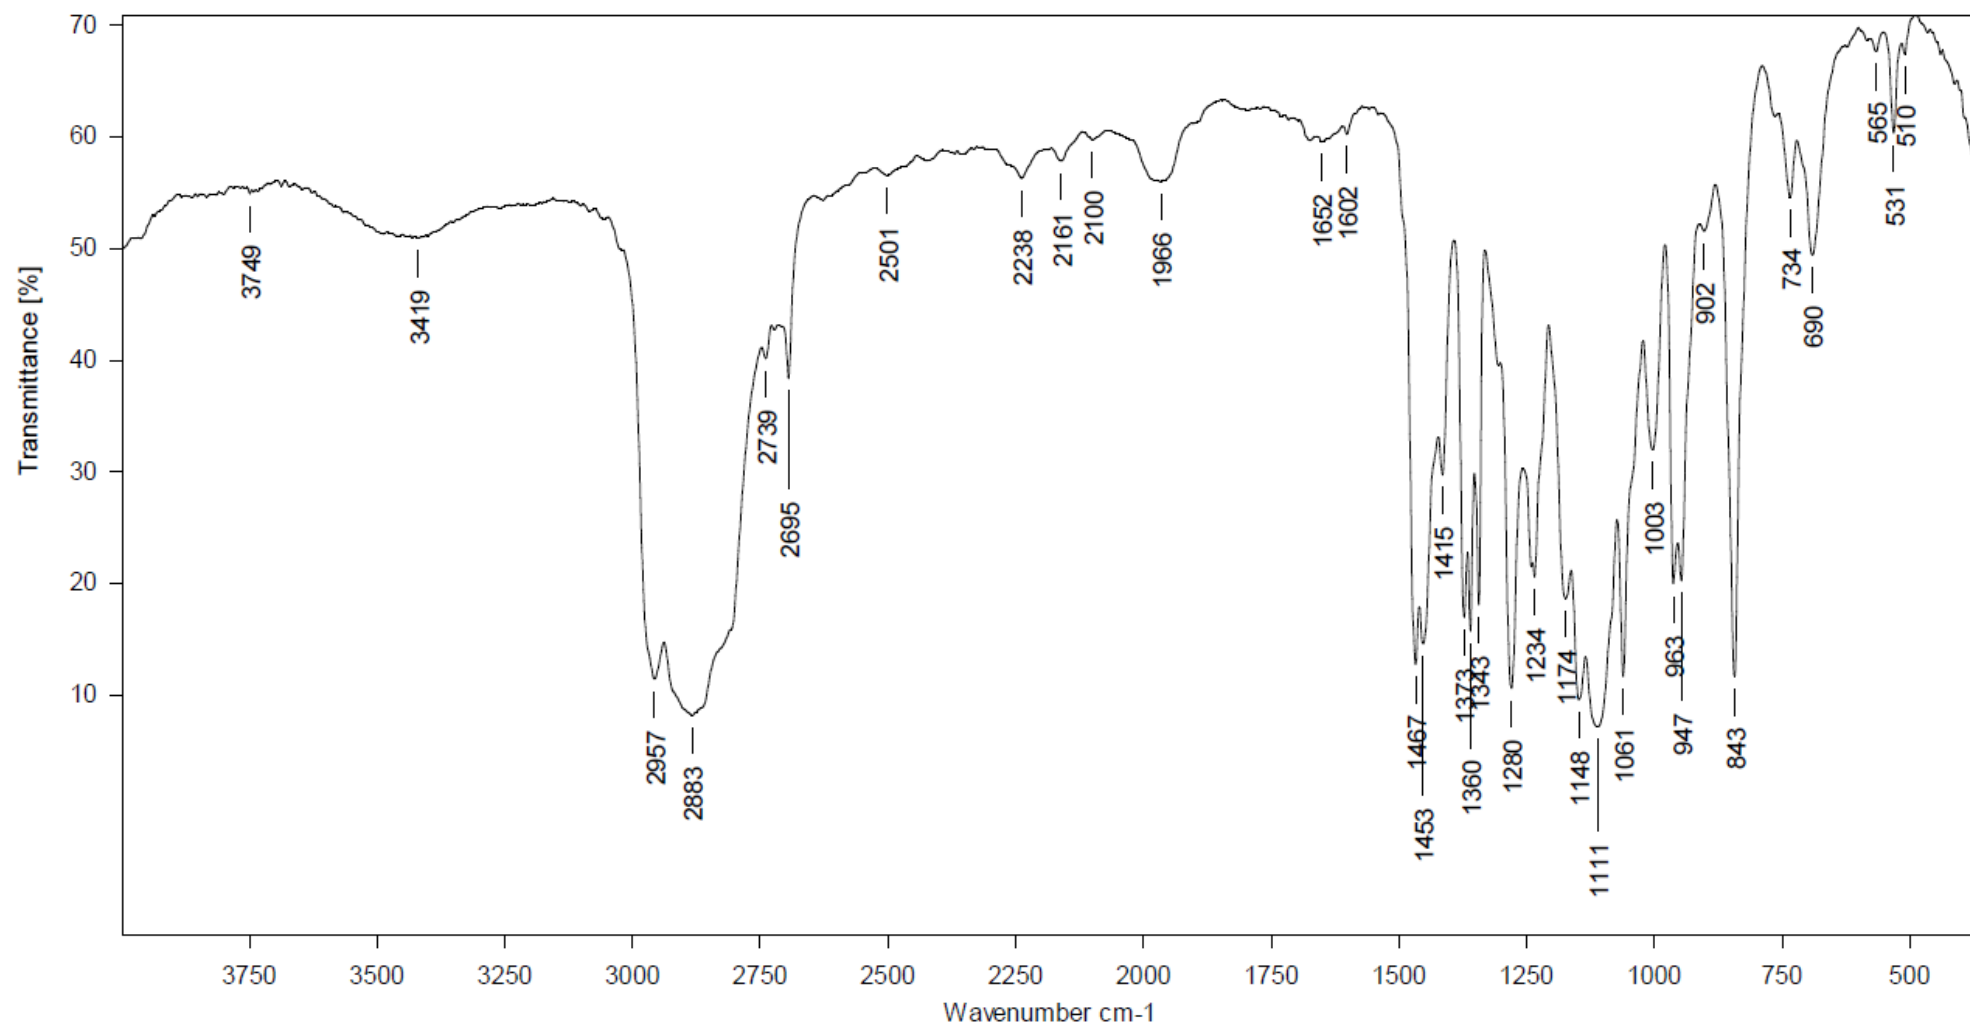

**Figure S4.** IR spectra of copolymer **1a**

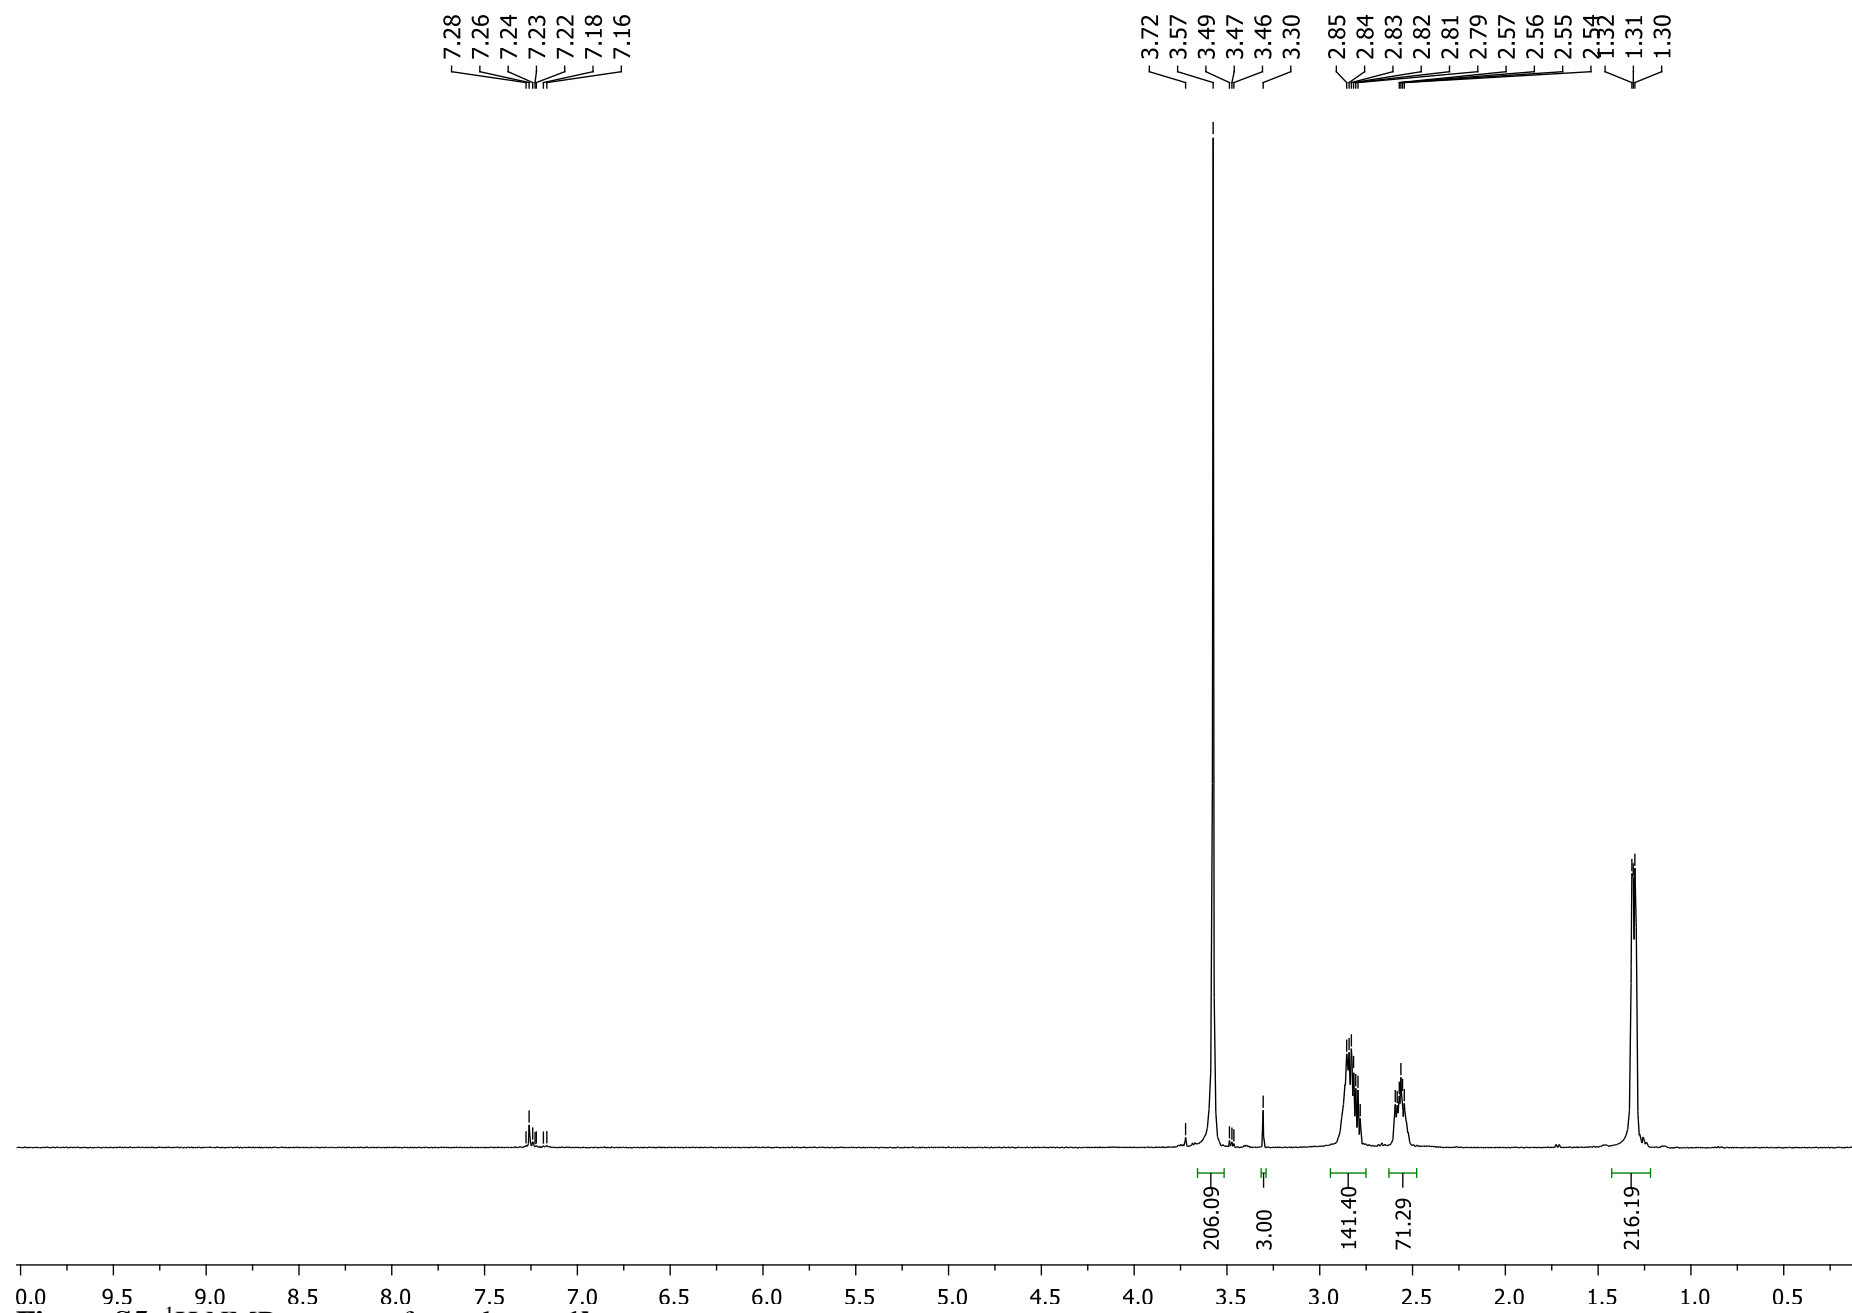

**Figure S5.**  $^1\text{H}$  NMR spectra of copolymer **1b**

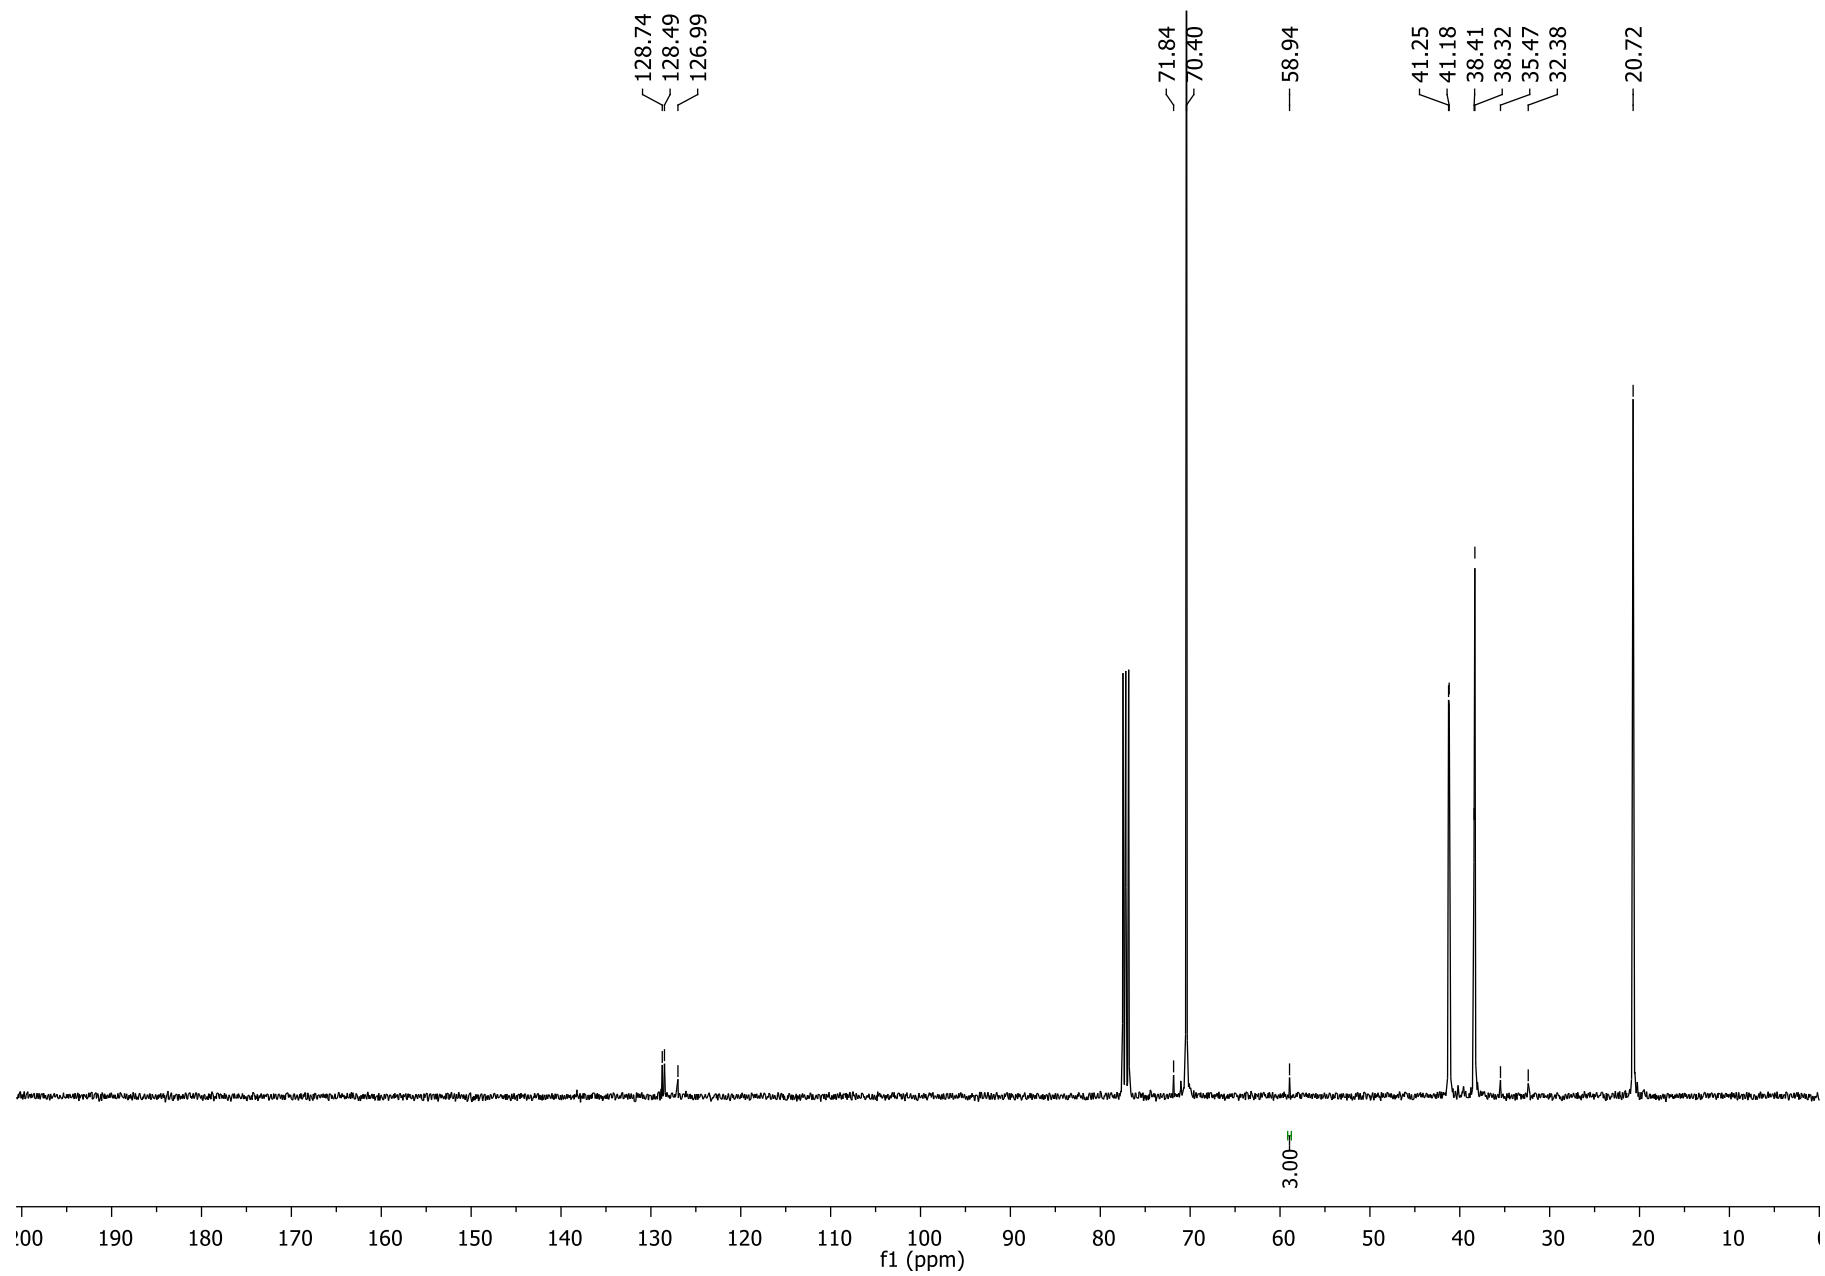

**Figure S6.** <sup>13</sup>C NMR spectra of mPEG-PPS-mPEG copolymer **1b**



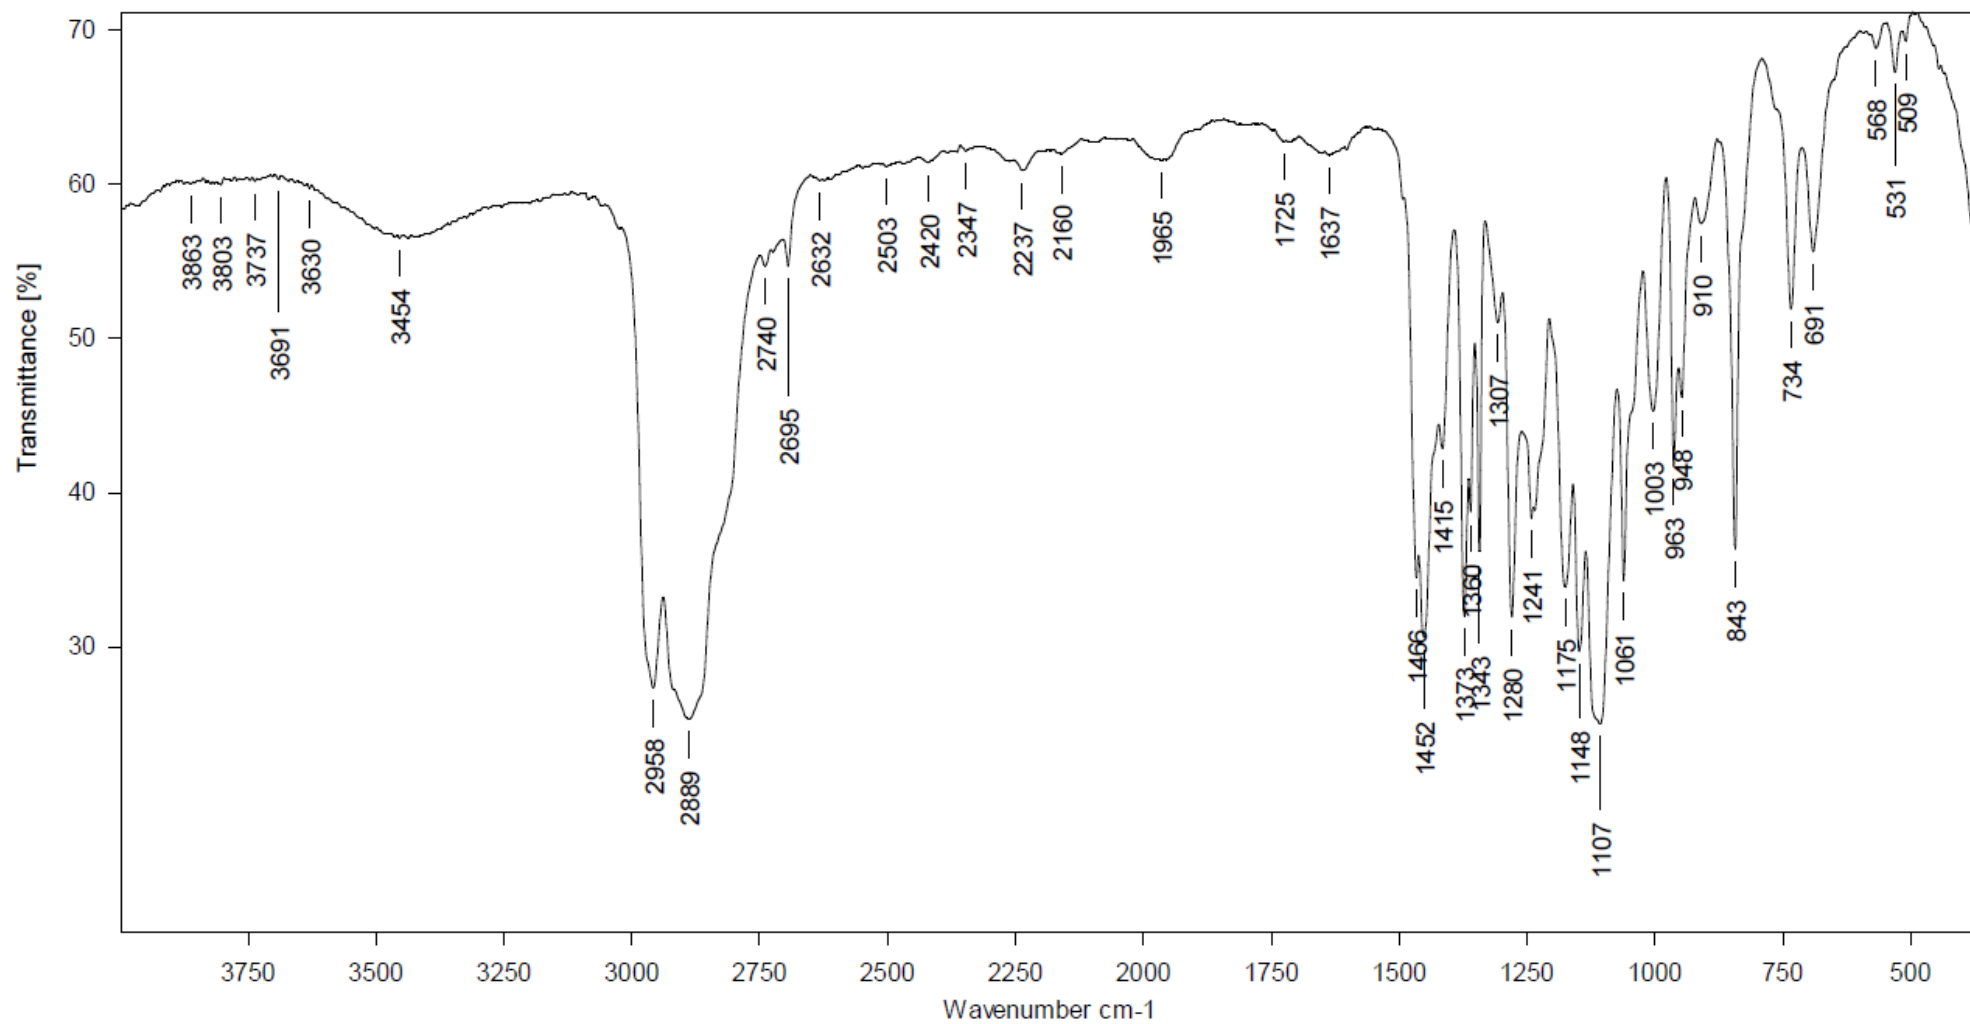

**Figure S7a.** IR spectra of copolymer **1b**

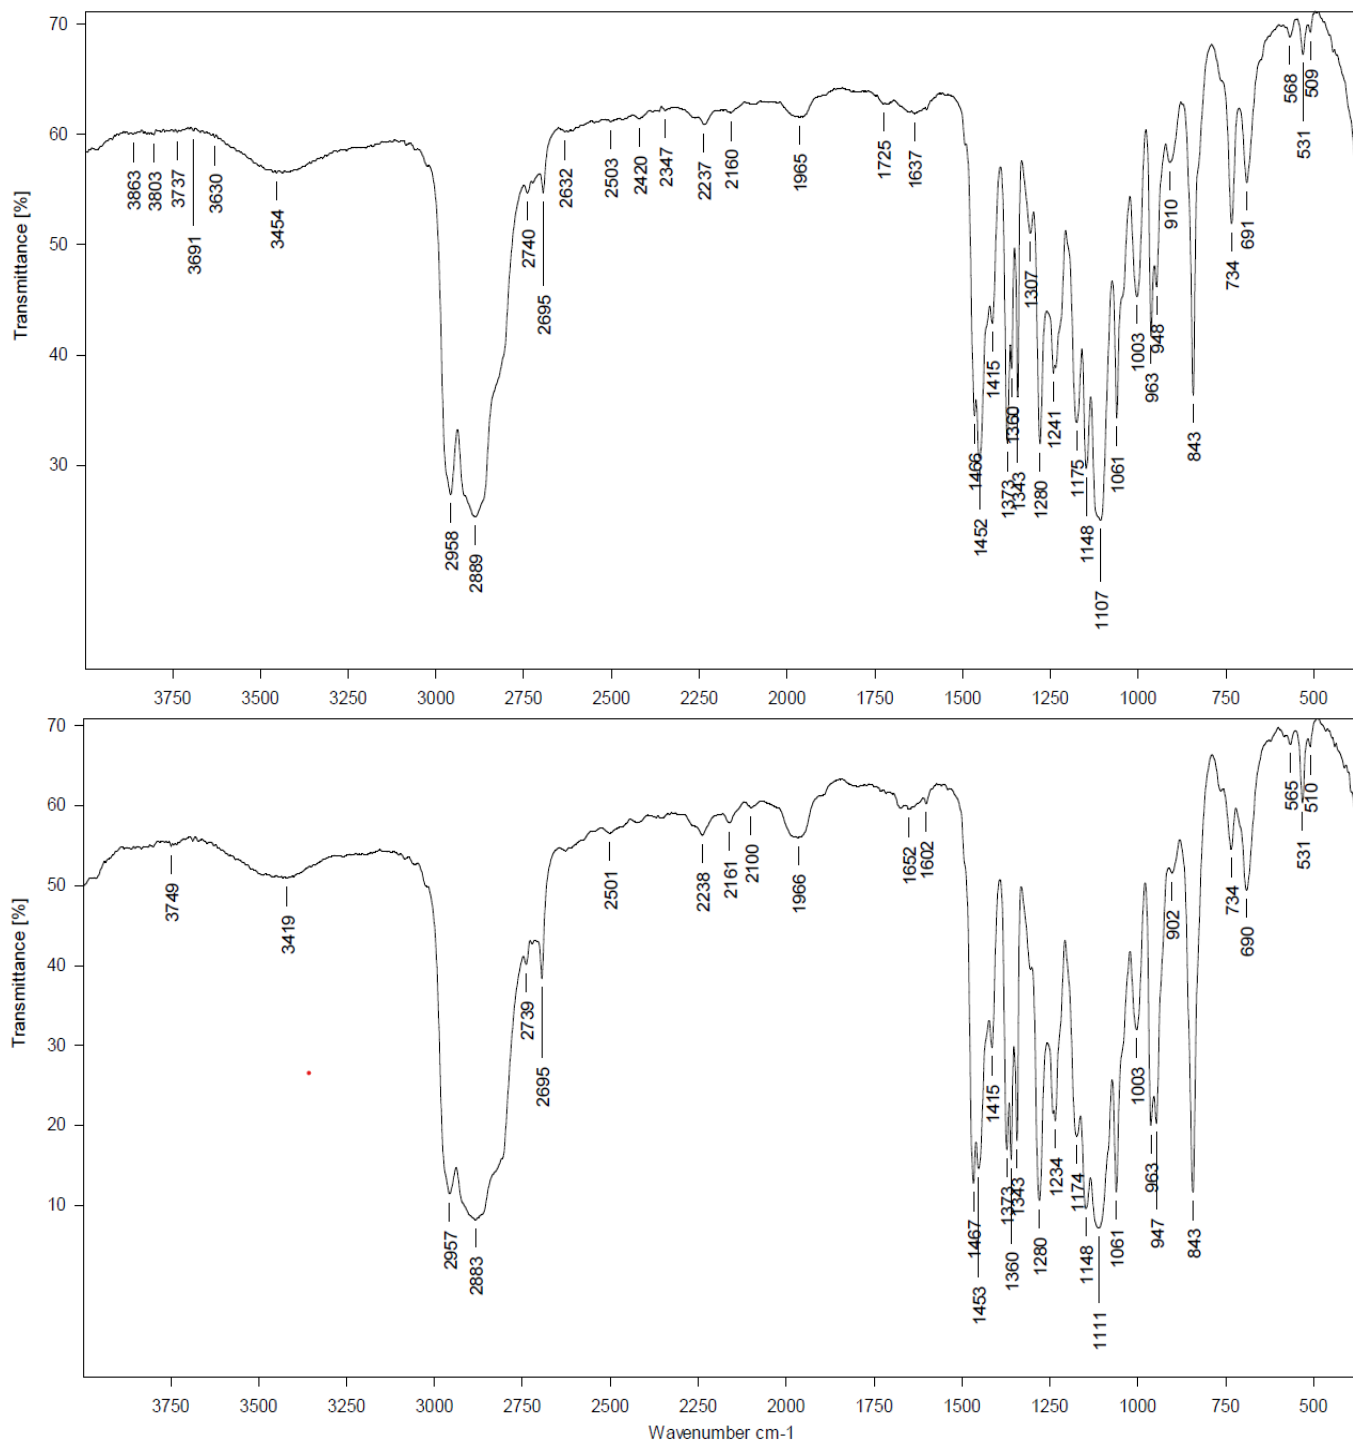

**Figure S7b.** Comparison of IR spectra of copolymer **1a** and **1b**

**A** Z-Average (d.nm): 36,74  
 Pdi: 0,142  
 Intercept: 0,929  
 Result quality : Good

|         | Size (d.nm): | % Intensity: | St Dev (d.nm): |
|---------|--------------|--------------|----------------|
| Peak 1: | 41,35        | 100,0        | 15,63          |
| Peak 2: | 0,000        | 0,0          | 0,000          |
| Peak 3: | 0,000        | 0,0          | 0,000          |

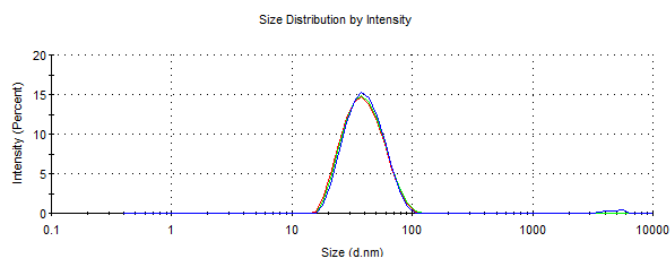

**B** Z-Average (d.nm): 36,25  
 Pdi: 0,102  
 Intercept: 0,961  
 Result quality : Good

|         | Size (d.nm): | % Intensity: | St Dev (d.nm): |
|---------|--------------|--------------|----------------|
| Peak 1: | 40,16        | 100,0        | 12,79          |
| Peak 2: | 0,000        | 0,0          | 0,000          |
| Peak 3: | 0,000        | 0,0          | 0,000          |

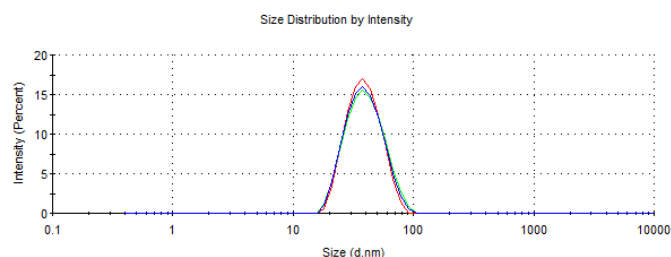

**C** Z-Average (d.nm): 38,05  
 Pdi: 0,136  
 Intercept: 0,951  
 Result quality : Good

|         | Size (d.nm): | % Intensity: | St Dev (d.nm): |
|---------|--------------|--------------|----------------|
| Peak 1: | 42,72        | 100,0        | 15,83          |
| Peak 2: | 0,000        | 0,0          | 0,000          |
| Peak 3: | 0,000        | 0,0          | 0,000          |

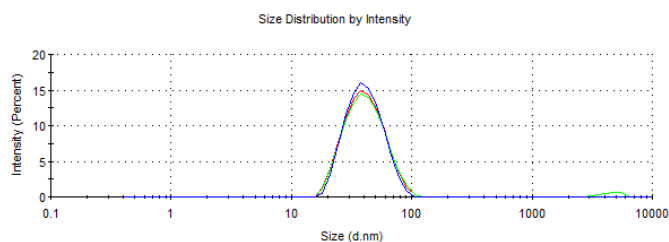

**D** Z-Average (d.nm): 36,74  
 Pdi: 0,142  
 Intercept: 0,929  
 Result quality : Good

|         | Size (d.nm): | % Number: | St Dev (d.nm): |
|---------|--------------|-----------|----------------|
| Peak 1: | 23,27        | 100,0     | 6,319          |
| Peak 2: | 0,000        | 0,0       | 0,000          |
| Peak 3: | 0,000        | 0,0       | 0,000          |

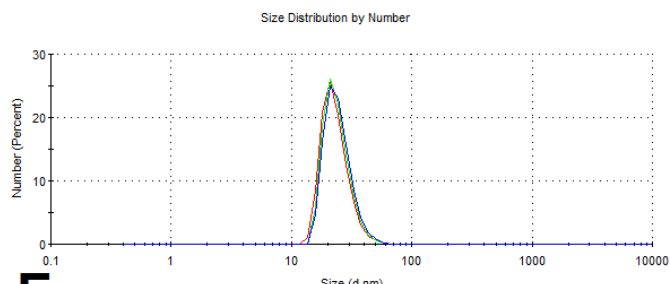

**E** Z-Average (d.nm): 36,25  
 Pdi: 0,102  
 Intercept: 0,961  
 Result quality : Good

|         | Size (d.nm): | % Number: | St Dev (d.nm): |
|---------|--------------|-----------|----------------|
| Peak 1: | 25,54        | 100,0     | 6,587          |
| Peak 2: | 0,000        | 0,0       | 0,000          |
| Peak 3: | 0,000        | 0,0       | 0,000          |

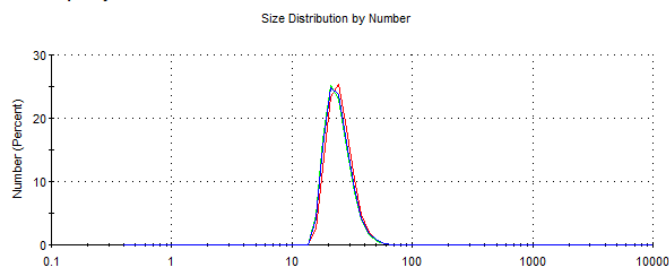

**F** Z-Average (d.nm): 38,05  
 Pdi: 0,136  
 Intercept: 0,951  
 Result quality : Good

|         | Size (d.nm): | % Number: | St Dev (d.nm): |
|---------|--------------|-----------|----------------|
| Peak 1: | 24,30        | 100,0     | 6,578          |
| Peak 2: | 0,000        | 0,0       | 0,000          |
| Peak 3: | 0,000        | 0,0       | 0,000          |

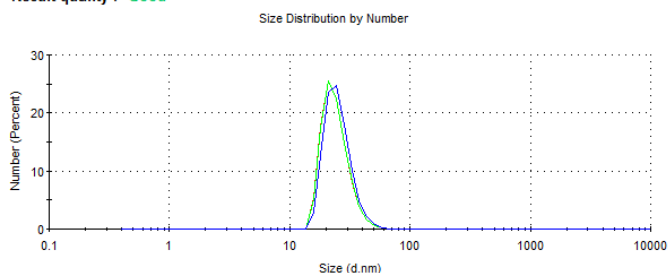

**Figure S8.** Screen shot of empty nanoreactor size distribution using the intensity(A-C) and number parameters (D-F) based on **1a**, copolymer concentrations 0.1, 0.2, 0.5, 0.75, 1% (wt/wt), 10 mM Tris buffer, pH=7.4, 25°C.

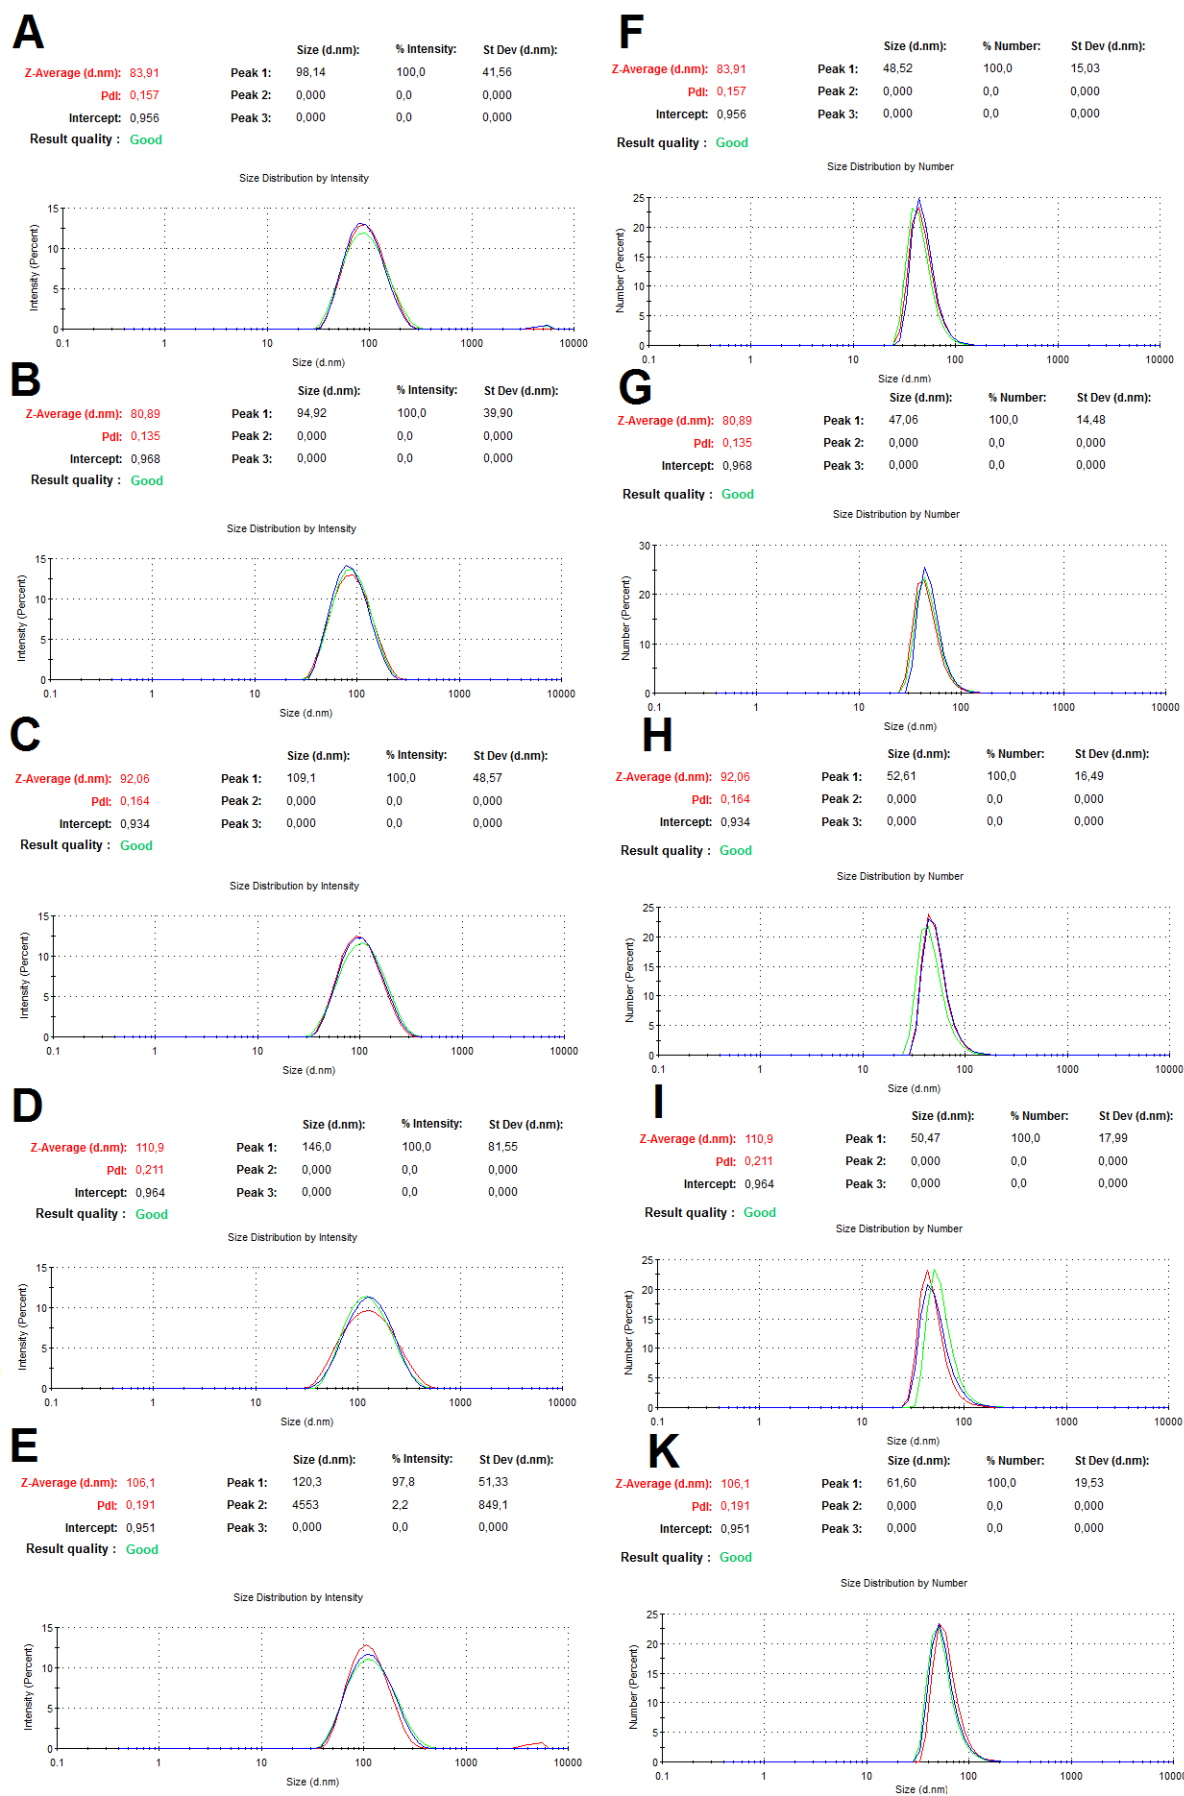

**Figure S9.** Screen shot of empty nanoreactor size distribution using the intensity(A-E) and number parameters (F-K) based on **1b**, copolymer concentrations 0.1, 0.2, 0.5, 0.75, 1% (wt/wt), 10 mM Tris buffer, pH=7.4, 25°C.

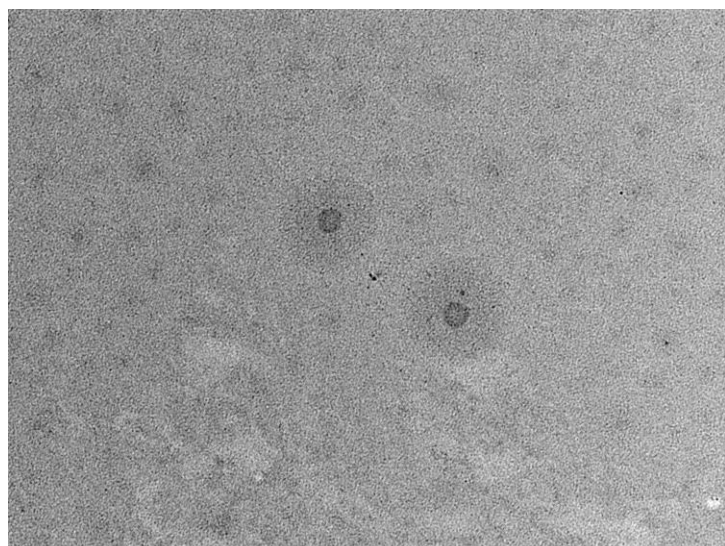

File name=2TB2 -3\_003.tif  
 Image comment=Hitachi TEM system.  
 Image date=2023/02/27 12:35:29  
 Image number=5735  
 Calibration=1.974nm/pixel at x10.0k  
 Magnification=x30.0k  
 Lens mode=Zoom-1 HR-1  
 Camera name=XR81-DIR  
 Spot number=4  
 Image rotation=0°  
 Acc. voltage=100.0kV  
 Emission=15.0uA  
 Stage X=-229 Y=147 Tilt=0.1 Azim=0.0  
 Camera size=3296x2464pixel

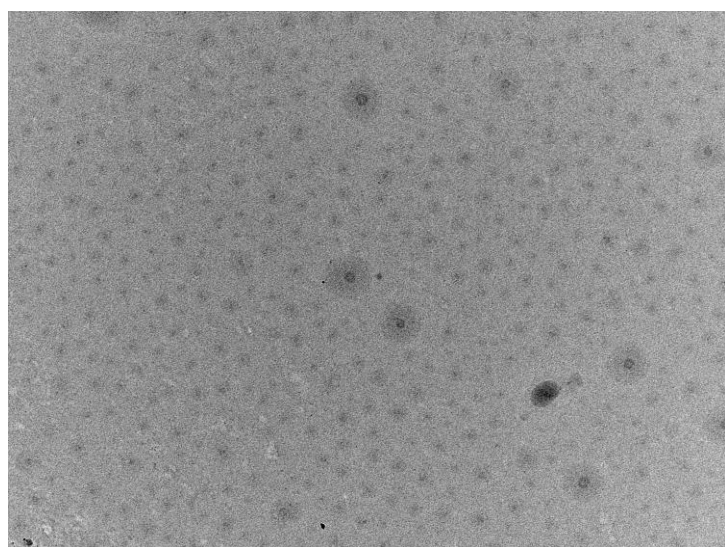

File name=2TB2 -3\_004.tif  
 Image comment=Hitachi TEM system.  
 Image date=2023/02/27 12:36:23  
 Image number=5736  
 Calibration=1.974nm/pixel at x10.0k  
 Magnification=x15.0k  
 Lens mode=Zoom-1 HR-1  
 Camera name=XR81-DIR  
 Spot number=4  
 Image rotation=0°  
 Acc. voltage=100.0kV  
 Emission=15.0uA  
 Stage X=-239 Y=149 Tilt=0.1 Azim=0.0  
 Camera size=3296x2464pixel

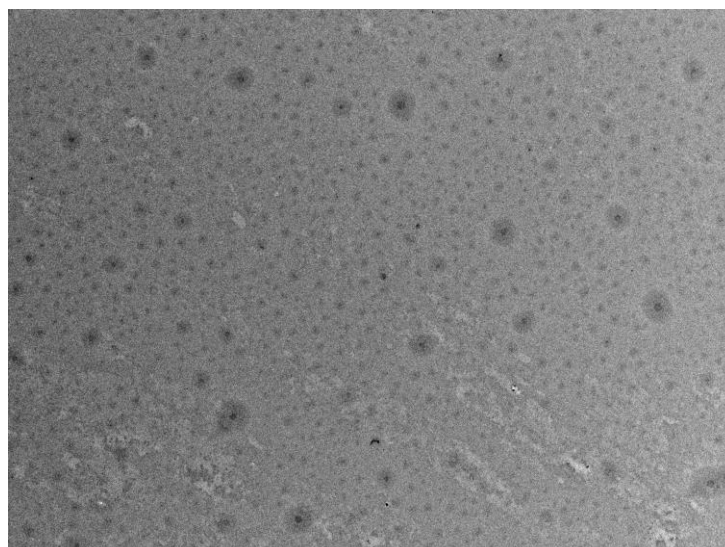

File name=2TB2 -3\_006.tif  
 Image comment=Hitachi TEM system.  
 Image date=2023/02/27 12:40:40  
 Image number=5738  
 Calibration=1.974nm/pixel at x10.0k  
 Magnification=x10.0k  
 Lens mode=Zoom-1 HC-1  
 Camera name=XR81-DIR  
 Spot number=1  
 Image rotation=0°  
 Acc. voltage=100.0kV  
 Emission=15.0uA  
 Stage X=-259 Y=70 Tilt=0.1 Azim=0.0  
 Camera size=3296x2464pixel

**Figure S10.** TEM Images of empty nanoreactors based on **1a**,  $C_{1a} = 10 \mu\text{g/mL}$ , Tris-Buffer, pH = 7.4, 25 °C.

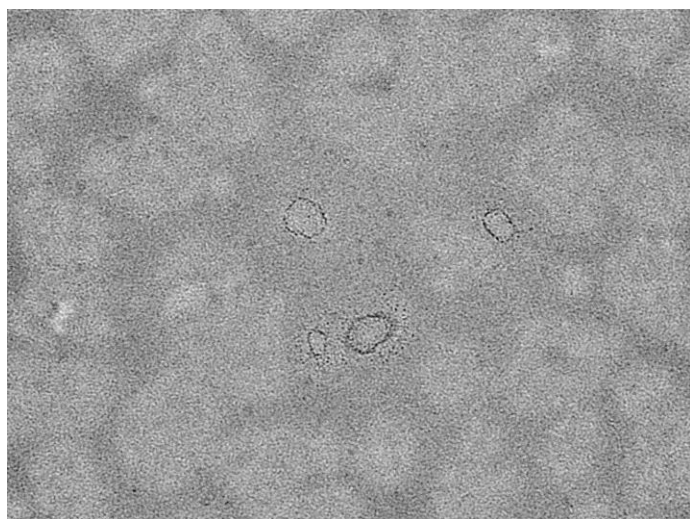

File name=5-TB-15\_009.tif  
 Image comment=Hitachi TEM system.  
 Image date=2022/09/02 10:58:16  
 Image number=5324  
 Calibration=1.974nm/pixel at x10.0k  
 Magnification=x50.0k  
 Lens mode=Zoom:1 HC:1  
 Camera name=XR81-DHR

Spot number=1  
 Image rotation=0°  
 Acc. voltage=100.0kV  
 Emission=15.0µA  
 Stage X=-133 Y=33 Tilt=-0.1 Azim=0.0  
 Camera size=3296x2464pixel

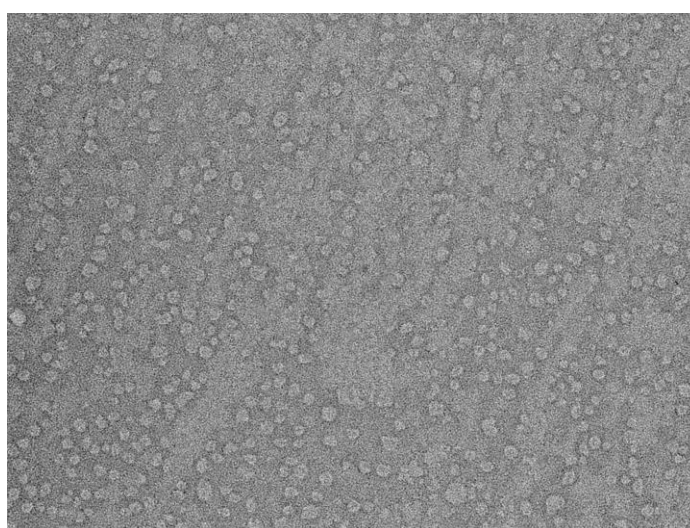

File name=5-TB-15\_002.tif  
 Image comment=Hitachi TEM system.  
 Image date=2022/09/02 10:47:50  
 Image number=5317  
 Calibration=1.974nm/pixel at x10.0k  
 Magnification=x20.0k  
 Lens mode=Zoom:1 HC:1  
 Camera name=XR81-DHR

Spot number=1  
 Image rotation=0°  
 Acc. voltage=100.0kV  
 Emission=15.0µA  
 Stage X=-299 Y=134 Tilt=-0.1 Azim=0.0  
 Camera size=3296x2464pixel

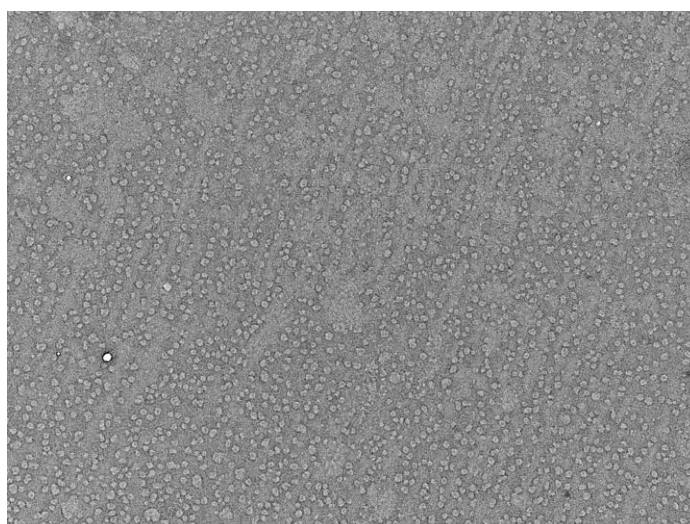

File name=5-TB-15\_001.tif  
 Image comment=Hitachi TEM system.  
 Image date=2022/09/02 10:45:43  
 Image number=5316  
 Calibration=1.974nm/pixel at x10.0k  
 Magnification=x10.0k  
 Lens mode=Zoom:1 HC:1  
 Camera name=XR81-DHR

Spot number=1  
 Image rotation=0°  
 Acc. voltage=100.0kV  
 Emission=15.0µA  
 Stage X=-299 Y=134 Tilt=-0.1 Azim=0.0  
 Camera size=3296x2464pixel

**Figure S11.** TEM Images of empty nanoreactors based on **1b**,  $C_{1b}$  = 10  $\mu\text{g/mL}$ , Tris-Buffer, pH = 7.4, 25 °C.

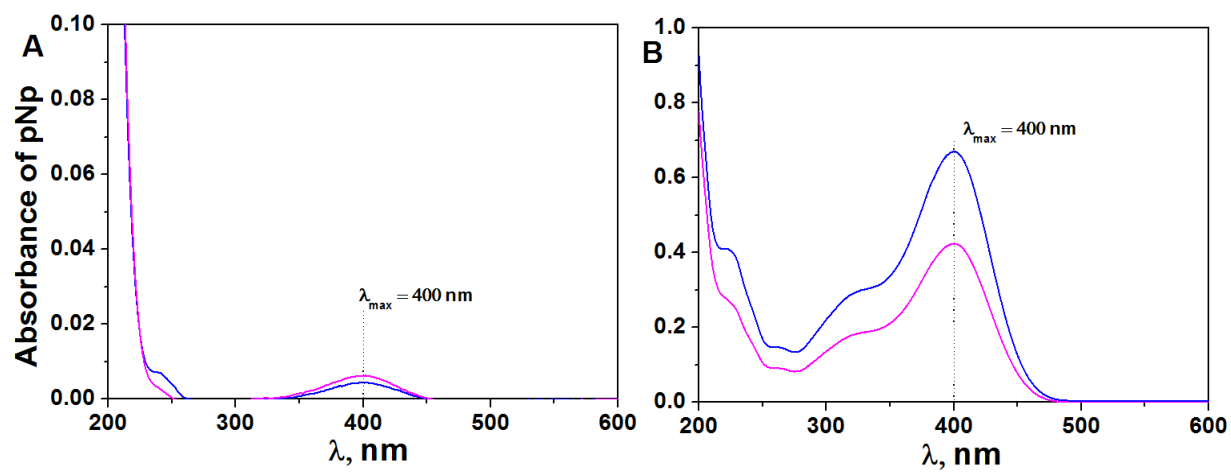

**Figure S12.** UV Absorbance spectra of pNp for encapsulation efficiency of nanoreactors based on **1b** (A) and **1a** (B), 10mM Tris buffer, pH=7.4, 25°C,  $C_{\text{polymers}}$  (wt/wt) = 0.5%.

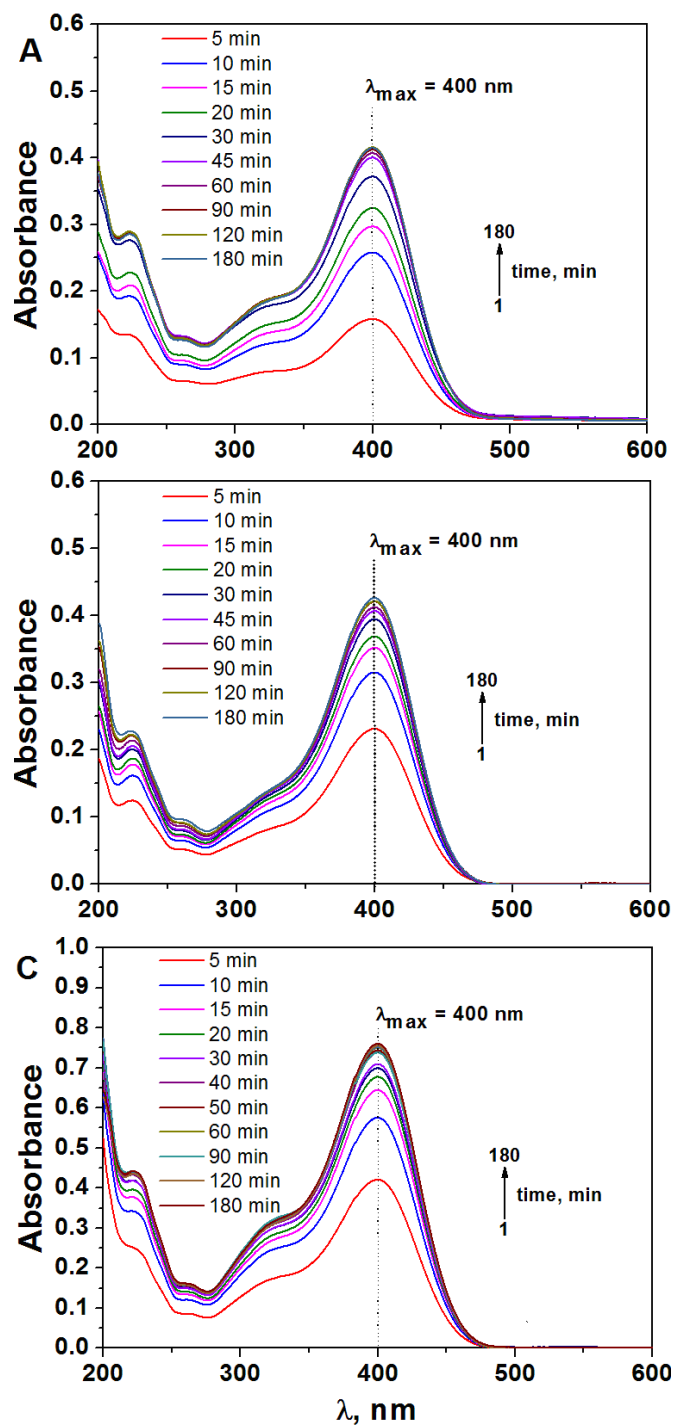

**Figure S13.** UV Absorbance spectra of pNp from nanoreactors **1a** (B) and **1b** (C), where control is in the absence of nanoreactors (A),  $C_{1a} = C_{1b} = 0.5\%$  (wt/wt),  $C_{\text{pNp}} = 0.1\%$  (wt/wt) 37 °C, 10 mM Tris-Buffer, pH = 7.4.



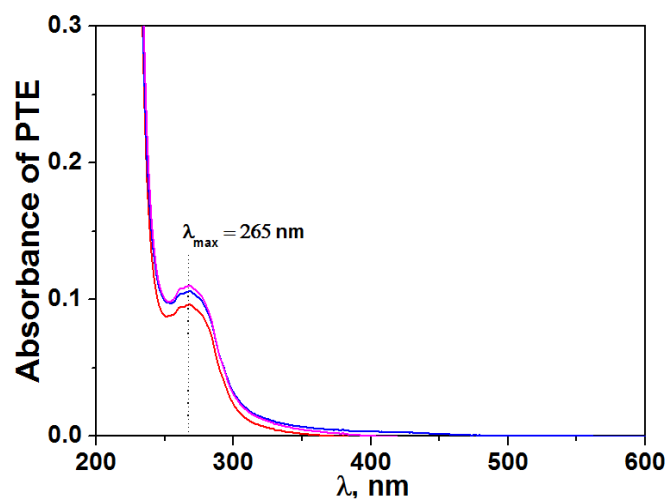

**Figure S14.** UV Absorbance spectra of enzyme for encapsulation efficiency of nanoreactors, 10mM Tris buffer, pH=7.4, 25°C,  $C_{1b}$  (wt/wt) = 0.5%.

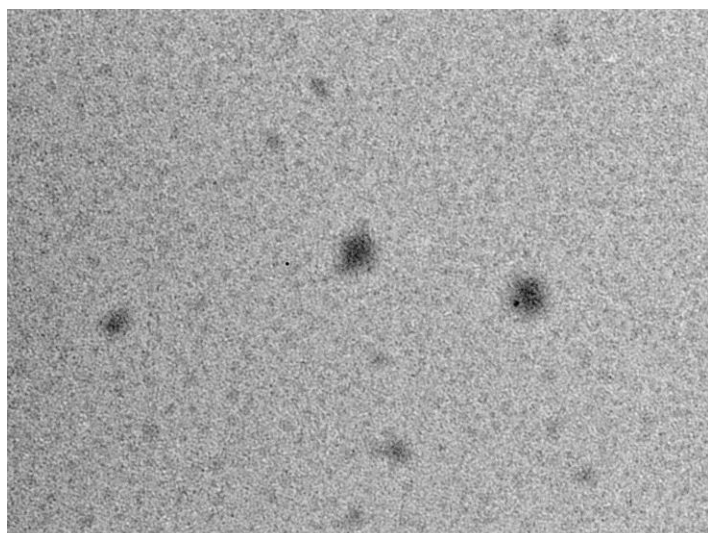

File name=5-TB-19\_003.tif  
Image comment=Hitachi TEM system.  
Image date=2022/10/13 10:42:35  
Image number=5540  
Calibration=1.974nm/pixel at x10.0k  
Magnification=x30.0k  
Lens mode=Zoom-1 HC-1  
Camera name=XR81-DIR

Spot number=1  
Image rotation=0°  
Acc. voltage=100.0kV  
Emission=15.0µA  
Stage X=160 Y=359 Tilt=-0.2 Azim=0.0  
Camera size=3296x2464pixel

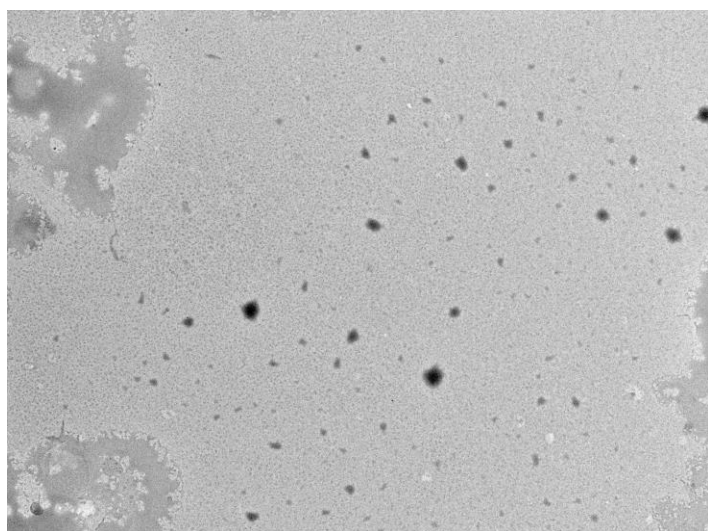

File name=5-TB-19\_004.tif  
Image comment=Hitachi TEM system.  
Image date=2022/10/13 10:43:32  
Image number=5541  
Calibration=1.974nm/pixel at x10.0k  
Magnification=x10.0k  
Lens mode=Zoom-1 HC-1  
Camera name=XR81-DIR

Spot number=1  
Image rotation=0°  
Acc. voltage=100.0kV  
Emission=15.0µA  
Stage X=154 Y=354 Tilt=-0.2 Azim=0.0  
Camera size=3296x2464pixel

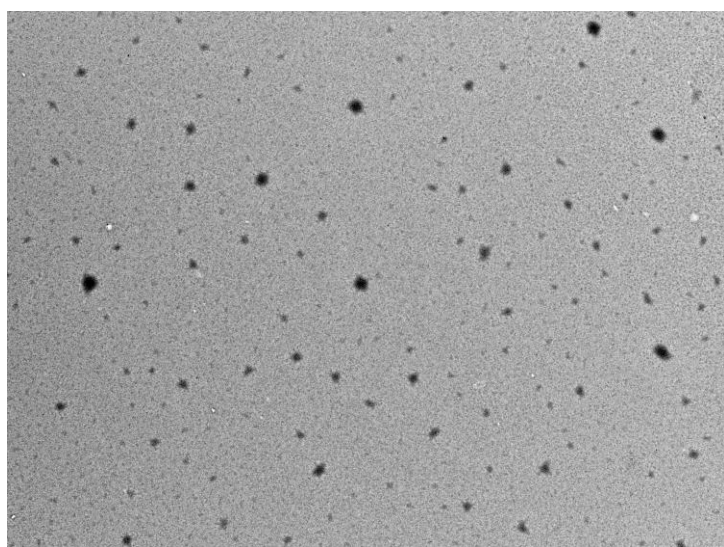

File name=5-TB-19\_005.tif  
Image comment=Hitachi TEM system.  
Image date=2022/10/13 10:44:35  
Image number=5542  
Calibration=1.974nm/pixel at x10.0k  
Magnification=x10.0k  
Lens mode=Zoom-1 HC-1  
Camera name=XR81-DIR

Spot number=1  
Image rotation=0°  
Acc. voltage=100.0kV  
Emission=15.0µA  
Stage X=142 Y=351 Tilt=-0.2 Azim=0.0  
Camera size=3296x2464pixel

**Figure S15.** TEM Images of enzyme-loaded nanoreactors based on **1b**, Tris-Buffer, pH = 7.4, 25 °C.

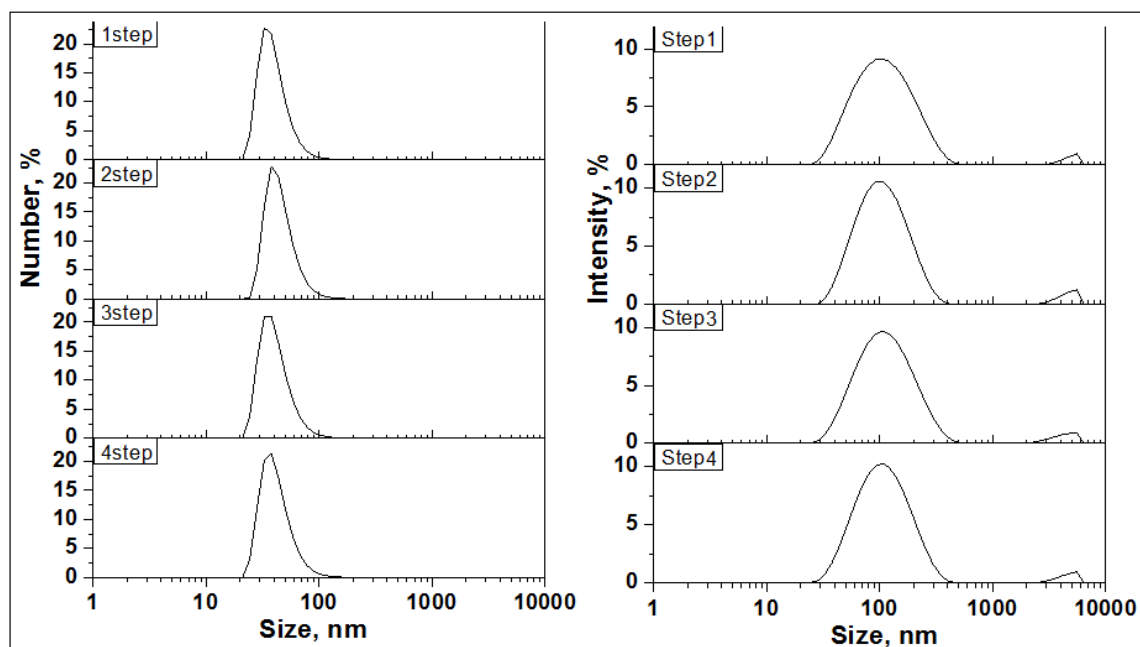

**Figures S16.** The size distribution using number (A-E) and intensity (F-J) parameters for nanoreactors based on **1b**, copolymer concentrations 0.5%, (wt/wt), 10 mM Tris buffer, pH=7.4, 25°C, where 1 step is keeping the blood at +37°C for 1 hour, 2 step is keeping the blood at +4°C for 1 hour, 3 step – centrifuge the blood (15min, 2500rpm, +4°C), 4 step – freezing the serum at -20°C – for 7 days.

**Table S1.** *In vitro* stability of nanoreactors **1b** in blood.

| Sample | Medium      | Z average, nm | PDI       |
|--------|-------------|---------------|-----------|
| nR-PTE | Tris-buffer | 95.7±0.1      | 0.16±0.01 |
| 1 step | blood       | 94±2          | 0.29±0.04 |
| 2 step | blood       | 92±2          | 0.27±0.03 |
| 3 step | serum       | 99±1          | 0.27±0.01 |
| 4 step | serum       | 92±2          | 0.26±0.01 |

where 1 step is keeping the blood at +37°C for 1 hour, 2 step is keeping the blood at +4°C for 1 hour, 3 step – centrifuge the blood (15min, 2500rpm, +4°C), 4 step – freezing the serum at -20°C – for 7 days.

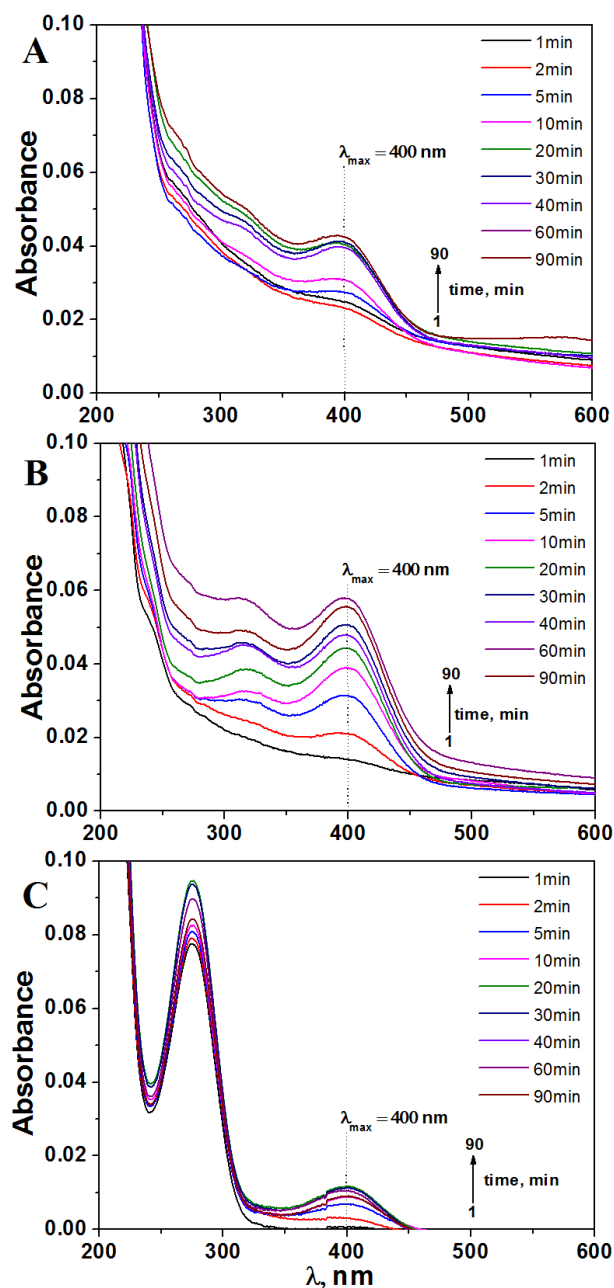

**Figure S17.** UV Absorbance spectra of pNp after the neutralization of POX by enzyme (A) and enzyme-loaded nanoreactors (B), control - pNp solution (pNp, 5  $\mu$ M) (C),  $C_{\text{POX}} = 5 \mu\text{M}$ ,  $C_{\text{enzyme}} = 1 \mu\text{M}$ , 10 mM Tris buffer, pH=7.4, 37°C.

**Table S2.** Prophylaxis and post-exposure treatment of paraoxon *s.c.* acute toxicity by *i.v.* administration of enzyme-loaded nanoreactors in mice, where Control 1 is the EtOH 10% in sodium chloride 0.9% solution (*s.c.*) and Control 2 is empty nanoreactor solution (*i.v.*).

| Dose,<br>mg/kg                                                     | Animals<br>dead / total |
|--------------------------------------------------------------------|-------------------------|
| Paraoxon acute toxicity study                                      |                         |
| Control 1                                                          | 0/3                     |
| Control 2                                                          | 0/3                     |
| 0.5                                                                | 0/3                     |
| 0.625                                                              | 0/3                     |
| 0.65                                                               | 1/3                     |
| 0.7                                                                | 3/3                     |
| 0.75                                                               | 3/3                     |
| 1.25                                                               | 3/3                     |
| enzyme-loaded nanoreactors prophylactic <i>i.v.</i> administration |                         |
| 5                                                                  | 0/3                     |
| 10                                                                 | 1/3                     |
| 15                                                                 | 4/6                     |
| 25                                                                 | 3/3                     |
| enzyme-loaded nanoreactors <i>i.v.</i> treatment                   |                         |
| 2.5                                                                | 0/3                     |
| 5                                                                  | 1/3                     |
| 10                                                                 | 3/3                     |

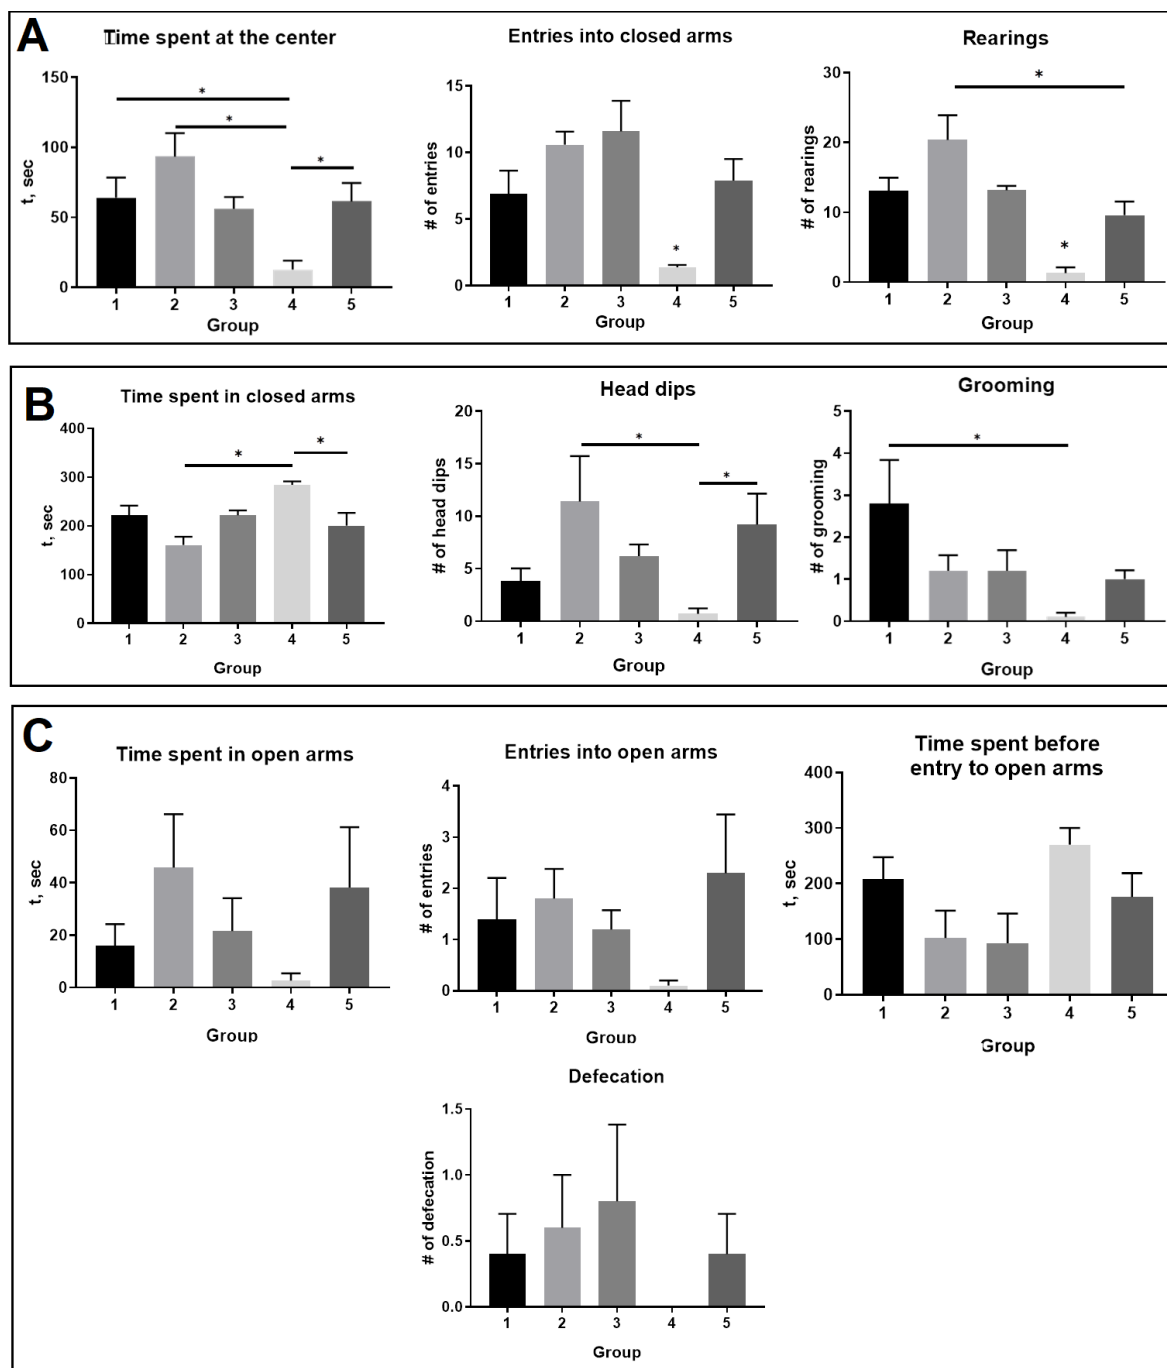

**Figure S18.** Elevated cross maze parameters on the 1<sup>st</sup> day of experiment, \*  $p < 0.05$

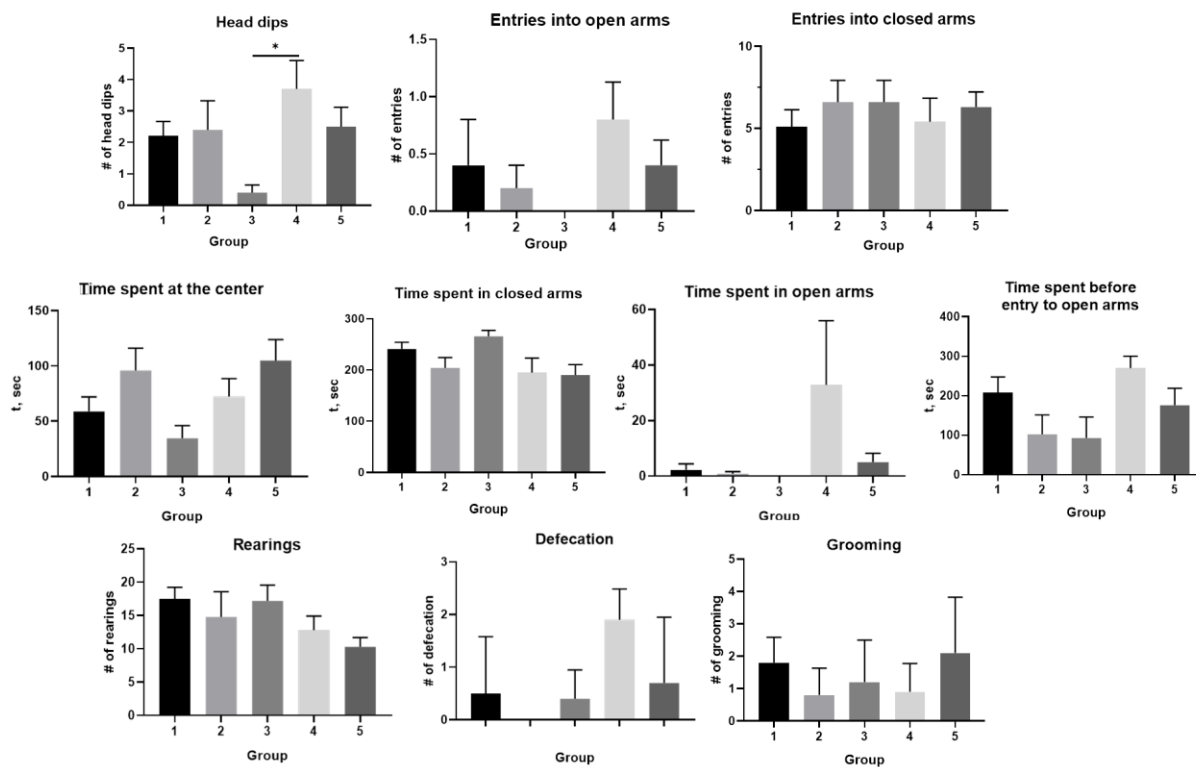

**Figure S19.** Elevated cross maze parameters on the 30<sup>th</sup> day of experiment, \*  $p < 0.05$ .



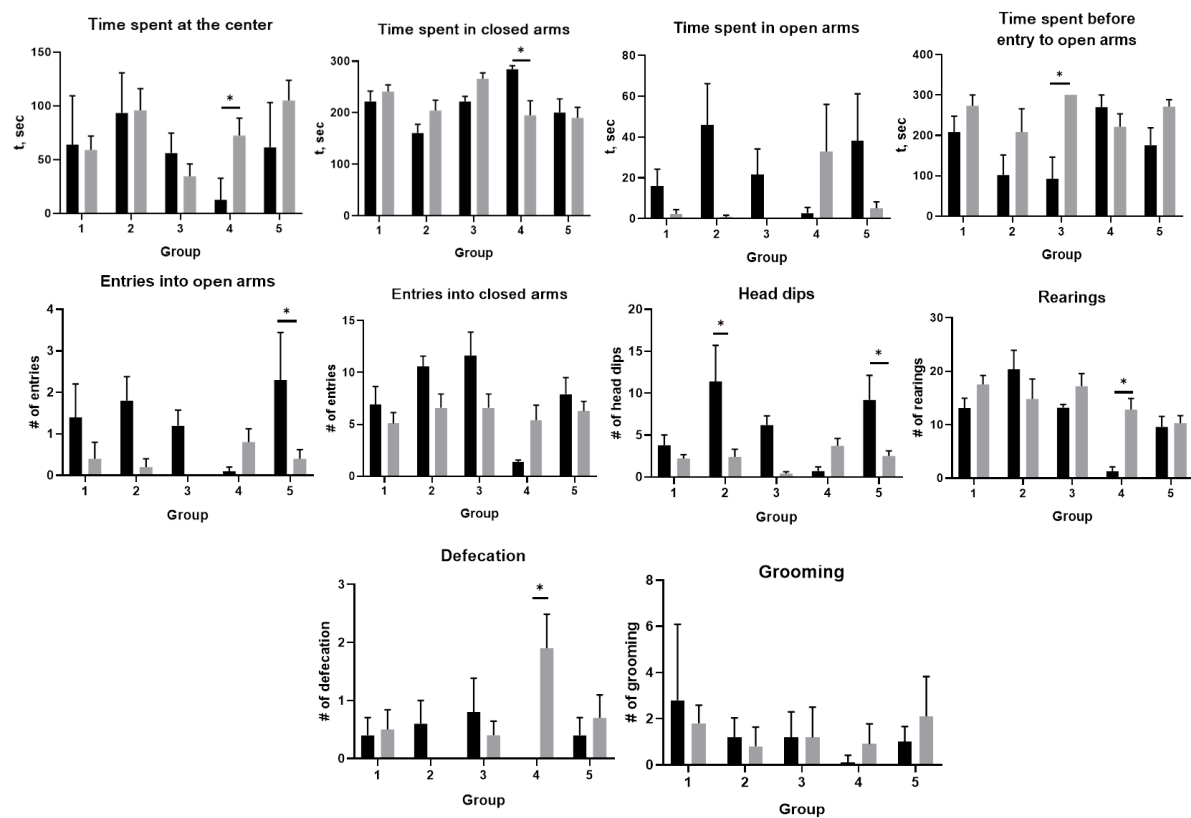

**Figure S20.** Elevated cross maze parameters on the 1<sup>st</sup> (black column) vs 30<sup>th</sup> (grey column) days of experiment, \*  $p < 0.05$ .

# Two sample t Test (16/06/23 20:31:10)

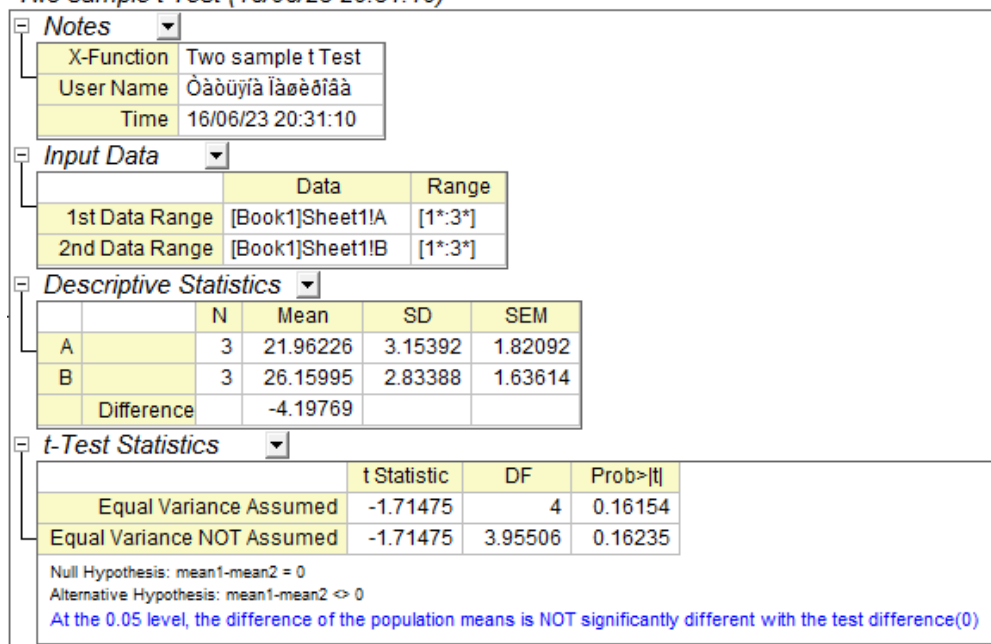

**Figure S21.** Student's t-test for free enzyme (1) and nanoreactor based on **1b** (2) 1<sup>st</sup> injection.

# Two sample t Test (16/06/23 21:21:10)

Notes

|            |                   |
|------------|-------------------|
| X-Function | Two sample t Test |
| User Name  | Óàòüýíà ìàøèðíàà  |
| Time       | 16/06/23 21:21:10 |

Input Data

|                | Data            | Range   |
|----------------|-----------------|---------|
| 1st Data Range | [Book2]Sheet1!A | [1*:3*] |
| 2nd Data Range | [Book2]Sheet1!B | [1*:3*] |

Descriptive Statistics

|            | N | Mean     | SD      | SEM     |
|------------|---|----------|---------|---------|
| A          | 3 | 26.15995 | 2.83388 | 1.63614 |
| B          | 3 | 25.12116 | 2.2397  | 1.29309 |
| Difference |   | 1.03879  |         |         |

t-Test Statistics

|                            | t Statistic | DF      | Prob> t |
|----------------------------|-------------|---------|---------|
| Equal Variance Assumed     | 0.49812     | 4       | 0.64454 |
| Equal Variance NOT Assumed | 0.49812     | 3.79727 | 0.64586 |

Null Hypothesis: mean1-mean2 = 0  
Alternative Hypothesis: mean1-mean2 <> 0  
At the 0.05 level, the difference of the population means is NOT significantly different with the test difference(0)

**Figure S22.** Student's t-test for nanoreactor 1<sup>st</sup> injection and nanoreactor 2<sup>nd</sup> injection (after 30 days) based on **1b**.

# ANOVAOneWay (16/06/23 21:21:37)

+

Notes

▼

+

Input Data

▼

-

Descriptive Statistics

▼

|   | Sample Size | Mean     | Standard Deviation | SE of Mean |
|---|-------------|----------|--------------------|------------|
| A | 3           | 21.96226 | 3.15392            | 1.82092    |
| B | 3           | 26.15995 | 2.83388            | 1.63614    |
| C | 3           | 25.12116 | 2.2397             | 1.29309    |

-

One Way ANOVA

▼

-

Overall ANOVA

▼

|       | DF | Sum of Squares | Mean Square | F Value | Prob>F  |
|-------|----|----------------|-------------|---------|---------|
| Model | 2  | 28.67837       | 14.33919    | 1.87079 | 0.23365 |
| Error | 6  | 45.98857       | 7.66476     |         |         |
| Total | 8  | 74.66694       |             |         |         |

Null Hypothesis: The means of all levels are equal.

Alternative Hypothesis: The means of one or more levels are different.

At the 0.05 level, the population means are not significantly different.

-

Fit Statistics

▼

|  | R-Square | Coeff Var | Root MSE | Data Mean |
|--|----------|-----------|----------|-----------|
|  | 0.38408  | 0.1134    | 2.76853  | 24.41446  |

**Figure S23.** One Way ANOVA for free enzyme 1<sup>st</sup> injection, nanoreactor 1<sup>st</sup> injection and nanoreactor 2<sup>nd</sup> injection (after 30 days) based on **1b**.

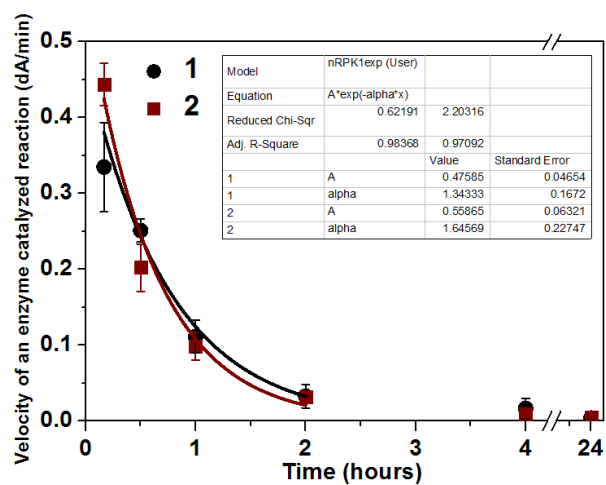

**Figure S24.** Pharmacokinetic profiles in mouse plasma after intravenous injection of free enzyme (1), enzyme-loaded nanoreactors made by three-block copolymers (2) after second injection (30-day). The dose of enzyme is 5.76 mg/kg. Each point represents the mean  $\pm$  SD in 3 mice.

**Table S3.** Pharmacokinetic parameters observed in mouse after intravenous injection of free enzyme and enzyme-loaded nanoreactors second time after 1 month of 1<sup>st</sup> injections. The dose of enzyme 5.76 mg/kg. Results represent the mean  $\pm$  SD for three mice, three-block copolymer nanoreactor.

| Sample                     | number<br>of injections | $\bar{\delta}$<br>(min <sup>-1</sup> ) | $t_{1/2\alpha}$ <sup>*</sup><br>(min) |
|----------------------------|-------------------------|----------------------------------------|---------------------------------------|
| Free enzyme                | 2, 30-day               | 0.0224 $\pm$ 0.0028                    | 30.96 $\pm$ 3.85                      |
| Enzyme-loaded nanoreactors | 2, 30-day               | 0.0274 $\pm$ 0.0038                    | 25.27 $\pm$ 3.49                      |

<sup>\*</sup> $t_{1/2\alpha} = \ln 2/\alpha$ , in which  $\alpha$  is the distribution rate (min<sup>-1</sup>) from blood. Data were analyzed via two-tailed Student's t test (\* $p \leq 0.05$ )

## Two sample t Test (19/06/23 16:22:33)

Notes

|            |                   |
|------------|-------------------|
| X-Function | Two sample t Test |
| User Name  | Ôàòüÿîà ìàøèèîîâà |
| Time       | 19/06/23 16:22:33 |

Input Data

|                | Data            | Range   |
|----------------|-----------------|---------|
| 1st Data Range | [Book1]Sheet1!1 | [1*:3*] |
| 2nd Data Range | [Book1]Sheet1!2 | [1*:3*] |

Descriptive Statistics

|            | N | Mean     | SD      | SEM     |
|------------|---|----------|---------|---------|
| "1"        | 3 | 30.9595  | 3.85343 | 2.22478 |
| "2"        | 3 | 25.27136 | 3.49305 | 2.01671 |
| Difference |   | 5.68814  |         |         |

t-Test Statistics

|                            | t Statistic | DF      | Prob> t |
|----------------------------|-------------|---------|---------|
| Equal Variance Assumed     | 1.89428     | 4       | 0.1311  |
| Equal Variance NOT Assumed | 1.89428     | 3.96205 | 0.13178 |

Null Hypothesis: mean1-mean2 = 0  
Alternative Hypothesis: mean1-mean2 <> 0  
At the 0.05 level, the difference of the population means is NOT significantly different with the test difference(0)

**Figure S25.** Student's t-test for free enzyme and three-block copolymer nanoreactor 2<sup>nd</sup> injection.

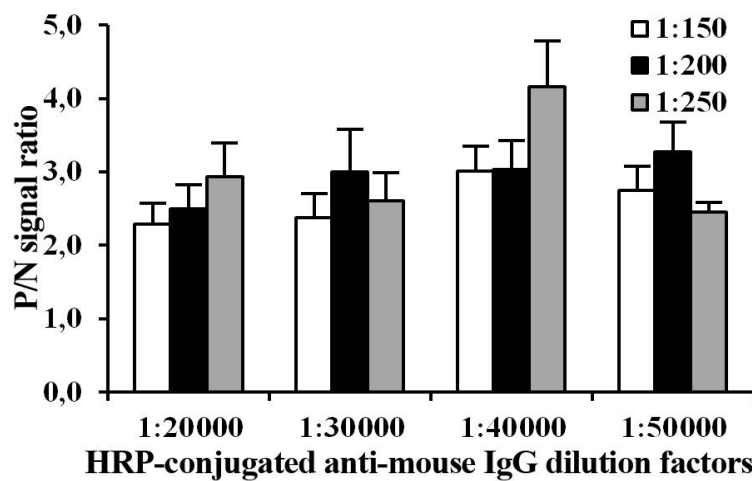

**Figure S26.** The ratio of the signals from positive and negative control samples (P/N signal ratio) with tested dilution factors.



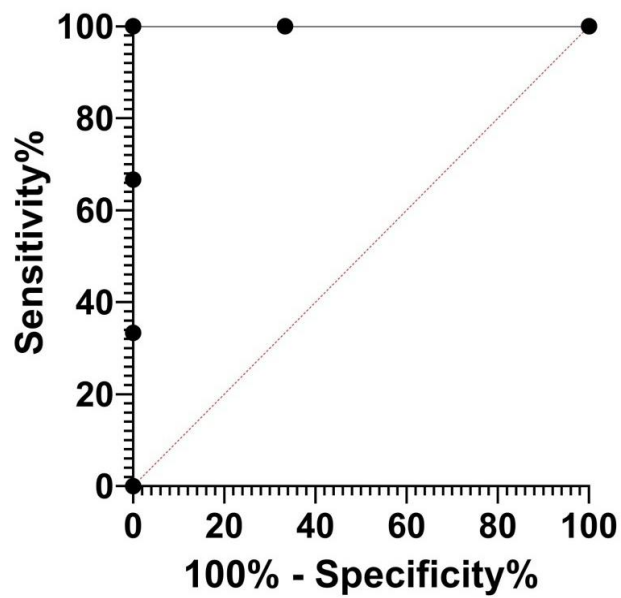

**Sensitivity: 100%**  
**Specificity: 100%**  
**Associated criterion: >0.55**  
**p < 0.05**

**Figure S27.** The receiver operating characteristic (ROC) analysis of ELISA showing sensitivity versus specificity for discrimination of positive and negative serum samples.

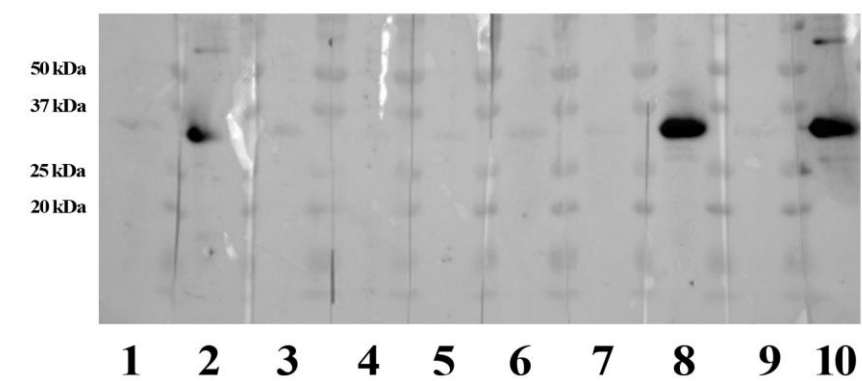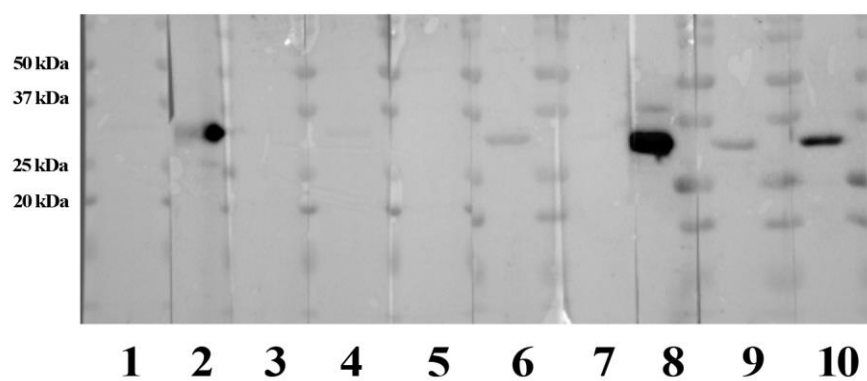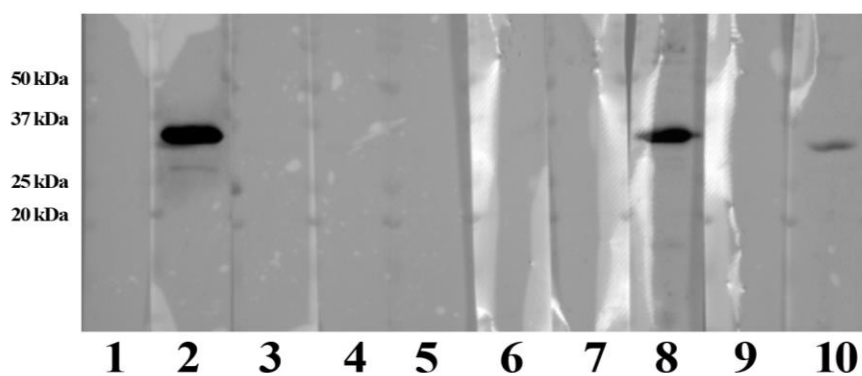

**Figure S28.** The western blot membranes for anti-PTE-IgG from 3 independent experiments: 1 - negative control, 2 – positive control, 3 – POX, 4 – empty nanoreactor, 5 - solvent, 6 – PTE, 7 – PTE-mPEG-PPS-mPEG nanoreactor (1 injection), 8 - PTE-mPEG-PPS-mPEG nanoreactor (2 injections), 9 - PTE-mPEG-PPS nanoreactor (1 injection), 10 - PTE-mPEG-PPS nanoreactor (2 injections).

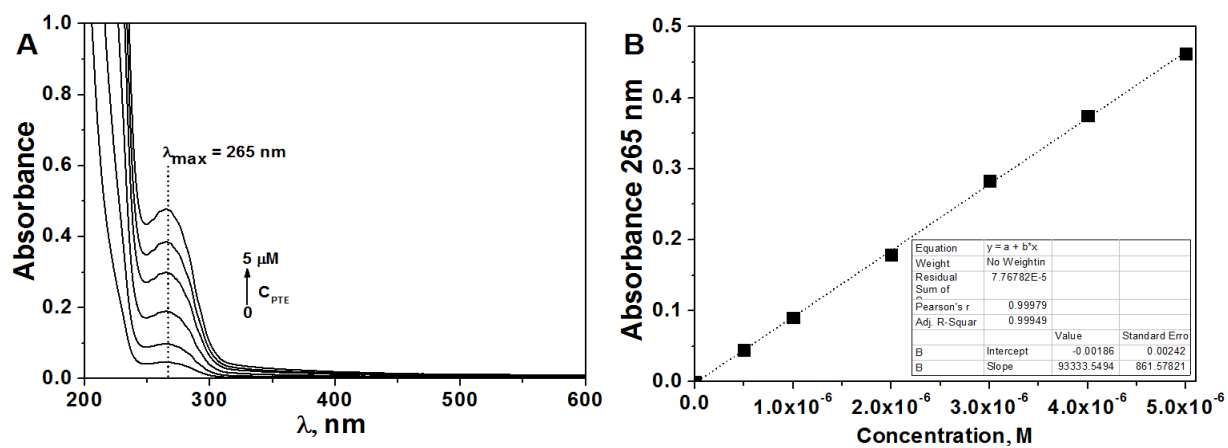

**Figure S29.** UV Absorbance spectra (A) and calibration curve (B) of Phosphotriesterase, 10mM Tris buffer, pH=7.4, 25°C.

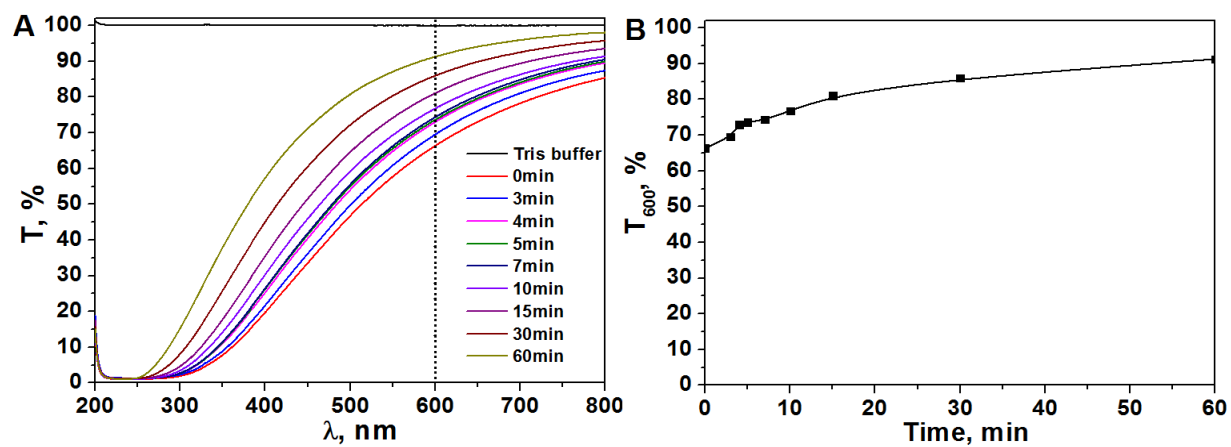

**Figure S30.** Transmittance of empty nanoreactors under centrifugation conditions at 5000 rpm, using centrifuge over time,  $C_{1b}$  (wt/wt) = 0.5%, 10 mM Tris buffer, pH=7.4.
